1 **Research Article**

2

3 **SARS-CoV-2 wastewater concentration and linked longitudinal seroprevalence: a spatial**  
4 **analysis of strain mutation, post-COVID-19 vaccination effect, and hospitalization burden**  
5 **forecasting**

6

7 Rochelle H Holm\*, Grzegorz A Rempala\*, Boseung Choi\*, J Michael Brick, Alok R Amraotkar,  
8 Rachel J Keith, Eric C Rouchka, Julia H Chariker, Kenneth E Palmer, Ted Smith<sup>†</sup>, Aruni  
9 Bhatnagar<sup>†</sup>

10

11 \* - Joint first authors

12 † - Joint senior authors

13

14 Christina Lee Brown Envirome Institute, School of Medicine, University of Louisville,  
15 Louisville, KY 40202, USA (R H Holm PhD, A R Amraotkar MD, R J Keith PhD, T Smith PhD,  
16 A Bhatnagar PhD); Division of Biostatistics, College of Public Health, The Ohio State  
17 University, Columbus, OH 43210, USA (G A Rempala DSc); Division of Big Data Science,  
18 Korea University, Sejong, South Korea (B Choi PhD); Biomedical Mathematics Group, Institute  
19 for Basic Science, Daejeon, South Korea (B Choi PhD); Westat, Inc., Rockville, MD 20850,  
20 USA (J M Brick PhD); Department of Biochemistry and Molecular Genetics, University of  
21 Louisville, Louisville, KY 40292, USA (E C Rouchka DSc, J HChariker PhD); KY INBRE  
22 Bioinformatics Core, University of Louisville, Louisville, KY 40202, USA (E C Rouchka DSc, J  
23 H Chariker PhD); Center for Predictive Medicine for Biodefense and Emerging Infectious  
24 Diseases, University of Louisville, Louisville, KY 40202, USA (K E Palmer PhD); Department  
25 of Pharmacology and Toxicology, School of Medicine, University of Louisville, Louisville, KY  
26 40202, USA (K E Palmer PhD)

27

28 Correspondence to: Prof Aruni Bhatnagar, Christina Lee Brown Envirome Institute, School of  
29 Medicine, University of Louisville, Louisville, KY 40202, USA;  
30 aruni.bhatnagar@louisville.edu; 1.502.852.5724

31 **Summary**

32 **Background**

33 Since early in the COVID-19 pandemic, SARS-CoV-2 wastewater concentration has been  
34 measured as a surrogate for community prevalence. However, our knowledge remains limited  
35 regarding wastewater concentration and effects of the COVID-19 vaccination on overall disease  
36 burden as measured by hospitalization rates.

37

38 **Methods**

39 We used weekly SARS-CoV-2 wastewater concentration with a stratified random sampling of  
40 seroprevalence, and spatially linked vaccination and hospitalization data, from April to August  
41 2021. Our susceptible (*S*), vaccinated (*V*), variant-specific infected (*I*<sub>1</sub> and *I*<sub>2</sub>), recovered (*R*), and  
42 seropositive (*T*) model (*SVI<sub>2</sub>RT*) tracked prevalence longitudinally. This was related to  
43 wastewater concentration for a spatial analysis of strain mutation, vaccination effect, and overall  
44 hospitalization burden.

45

46 **Findings**

47 We found strong linear association between wastewater concentration and estimated community  
48 prevalence ( $r=0.916$ ). Based on the corresponding regression model, the 64% county vaccination  
49 rate translated into about 57% decrease in SARS-CoV-2 incidence. During the study period, the  
50 estimated effect of SARS-CoV-2 Delta variant emergence was seen as an over 7-fold increase of  
51 infection counts, which corresponded to over 12-fold increase in wastewater concentration.  
52 Hospitalization burden and wastewater concentration had the strongest correlation ( $r=0.963$ ) at 1  
53 week lag time. We estimated the community vaccination campaign resulted in about 63%  
54 reduction in the number of daily admissions over the study period. This protective effect was  
55 counteracted by the emergence of SARS-CoV-2 Delta strain mutation.

56

57 **Interpretation**

58 Wastewater samples can be used to estimate the effects of vaccination and hospitalization  
59 burden. Our study underscores the importance of continued environmental surveillance post-  
60 vaccine and provides a proof of concept for environmental epidemiology monitoring.

61

62 **Funding**

63 Centers for Disease Control and Prevention (75D30121C10273), Louisville Metro Government,  
64 James Graham Brown Foundation, Owsley Brown II Family Foundation, Welch Family, Jewish  
65 Heritage Fund for Excellence, the National Institutes of Health, (P20GM103436), the  
66 Rockefeller Foundation, and the National Sciences Foundation (DMS-2027001).

67

68 **Keywords:** COVID-19; environmental surveillance; epidemiology; sewer; vaccine; wastewater-  
69 based epidemiology

70 **Research in context**

71 **Evidence before this study:** We searched Web of Science and PubMed for all available articles  
72 until August 24, 2022, using the search terms [“seroprevalence” or “antibody”] AND  
73 [“wastewater”] AND [“vaccination”]. We examined only English literature. We identified 59  
74 studies. None of these studies considered community level randomized antibody testing paired  
75 with vaccination and SARS-CoV-2 wastewater concentration data. Where wastewater and  
76 vaccination status have been historically linked is with *Poliomyelitis*, in the known spatial scale  
77 of vaccination rates and using wastewater surveillance to confirm presence/absence of  
78 community infection. Few studies considered hepatitis A antibodies in workers exposed to  
79 sewage to guide vaccination campaigns. We also found some non-human subject research. To  
80 our knowledge, there is no real-world setting SARS-CoV-2 study where quantified wastewater  
81 concentration is linked to a large longitudinal stratified randomized seroprevalence sampling at a  
82 sub-population scale and the population has voluntary access to a vaccination reducing  
83 hospitalization burden.

84  
85 **Added value of this study:** To our knowledge, this study provides the first analysis of SARS-  
86 CoV-2 wastewater concentration as the basis for estimating subpopulation vaccination and virus  
87 mutation effects, and hospitalization burden in any country. We used actual seroprevalence data  
88 from a large US urban area that was rigorously collected through statistical sampling, to obtain a  
89 longitudinal estimate of disease prevalence. We then used a statistical model relating prevalence  
90 to wastewater concentration for a spatial analysis of vaccination, virus mutation effects, and for  
91 forecasting hospitalization burden. The methodology developed in the current paper has a  
92 potential to improve both the effectiveness of monitoring and the predictive accuracy of  
93 wastewater-based surveillance systems.

94  
95 **Implications of all the available evidence:** Our results show the potential of sustained  
96 environmental surveillance post-vaccine in urban areas and on removing bias in population-level  
97 estimates of prevalence of SARS-CoV-2 due to over-reliance on reported clinical testing data.  
98 The methodology presented here provides further proof wastewater monitoring can be  
99 successfully used as a tool for estimating both the community impact of changing disease  
100 patterns and various interventions over time. These findings have implications beyond current  
101 SARS-CoV-2 pandemic since our proposed approach is quite general and can be applied to other  
102 vaccine preventable diseases affecting human health in the absence of clinical testing data.

103 **1. Introduction**

104 There is an increasing realization that the current methods of disease monitoring based on  
105 individual testing may be insufficient to effectively combat the new, possibly much more  
106 infectious, severe acute respiratory syndrome coronavirus 2 (SARS-CoV-2) variants. This leaves  
107 public health researchers and policy makers in search for more reliable methods of measuring  
108 SARS-CoV-2 prevalence in communities and especially those not involving the (expensive)  
109 process of collecting individual level data. Wastewater concentration, when properly calibrated,  
110 can be a surrogate for the virus community prevalence analysis.<sup>1,2</sup> Wastewater epidemiology  
111 promises an exciting opportunity to estimate community disease prevalence even with  
112 asymptomatic, vaccine preventable, disease.<sup>2,3</sup> However, the handful of recent studies  
113 considering a relationship between SARS-CoV-2 wastewater concentration and the COVID-19  
114 vaccine have relied almost exclusively on statistical models calibrated with publicly available  
115 COVID-19 clinical case data.<sup>4-8</sup> These data run the risk of biased underrepresentation of  
116 asymptomatic individuals who may not seek testing, or individuals testing in settings where  
117 reporting is low or not required.<sup>9</sup> In this study we consider this question in the context of  
118 randomized seroprevalence surveillance, combining mechanistic and statistical frameworks to  
119 obtain a more robust and realistic answer.

120  
121 We used repeated cross-sectional community-wide stratified randomized sampling to measure  
122 SARS-CoV-2 nucleocapsid (N) specific IgG antibody-based seroprevalence in Jefferson County,  
123 Kentucky (USA), from April through August 2021 to determine post-vaccine community  
124 prevalence at a sub-population scale. We then related this to a statistical linear model and the  
125 available sub-population weekly wastewater surveillance data which thus yielded an explicit  
126 impact of vaccination and seroimmunity on SARS-CoV-2 wastewater concentration estimate,  
127 while controlling for prevalence in different epidemic phases. The latter may be easily translated  
128 into other important public health indicators such as the patterns of hospitalization.

129  
130 **2. Methods**

131 *2.1 Seroprevalence*

132 Community-wide stratified randomized seroprevalence sampling was conducted in four waves  
133 from April to August 2021 in Jefferson County, Kentucky (USA) which is also the consolidated  
134 government for the city of Louisville. Seroprevalence sampling was both before and during  
135 vaccination, but this analysis only considers the period after COVID-19 vaccines were made  
136 widely available to the public (N=3436). An address-based sampling frame was used to build  
137 four geographic zones. Invitations (~30,000 per wave) were mailed to sampled households and  
138 one random adult was selected to join the study. Participants completed an online consent form  
139 and survey and scheduled an in-person appointment for testing at a mobile site. In some cases,  
140 due to the timing of sampling waves, respondents may have had only the first of a two-dose  
141 vaccine series. Owing to elevated levels of vaccinated respondents in our study (~90%),  
142 seroprevalence was measured by response to IgG N antibodies.<sup>10</sup> It was assumed over the study  
143 period vaccination induced antibodies do not decay below detection. The nucleocapsid (N) IgG  
144 test sensitivity was 65% and the specificity was 85%. The seroprevalence sampling by  
145 geographical zones are described in more detail in the Supplemental Material section S1.

146 *2.2 Wastewater SARS-CoV-2 concentration*

147 Wastewater samples were collected twice per week from five wastewater treatment plants  
148 (N=520; Supplemental Material section S2) from April to August 2021. From an influent 24-  
149 hour composite sampler, 125 ml of subsample was collected and analyzed for SARS-CoV-2. In a  
150 few cases due to an equipment malfunction, a grab sample was collected. The geographic area  
151 and population serviced by a wastewater treatment plant comprises a sewershed, the zone for  
152 which we consider in our model analysis across a range of population sizes, income levels and  
153 racial and ethnic diversity.<sup>2</sup> Analysis used polyethylene glycol (PEG) precipitation with  
154 quantification in triplicate by reverse transcription polymerase chain reaction (RT-qPCR).<sup>11</sup> Data  
155 for SARS-CoV-2 (N1) are reported as weekly average copies/ml of wastewater with a threshold  
156 value for N1 assays of 7.5 copies/ml.

157  
158 *2.3 Administrative COVID-19 data*

159 Administrative data on COVID-19 vaccination and infected individuals' hospitalization was  
160 provided by the Jefferson County health authority, Louisville Metro Department of Public Health  
161 and Wellness (LMPHW), under a Data Transfer Agreement. Vaccination data were geocoded to  
162 the sewersheds using ArcGIS Pro version 2.8.0 (Redlands, CA). Daily hospitalization data was  
163 only available aggregated at a county level.

164  
165 *2.4 Analytical model*

166 The hybrid model for estimating the effect of vaccination and strain mutation on longitudinal  
167 wastewater concentration was developed by combining a compartmental ecological model with a  
168 statistical linear model. The former was used to longitudinally estimate population prevalence  
169 from the observed cross-sectional rates of seropositivity. We assumed the overall vaccination  
170 pattern as reported by the county, with the overall adult vaccination rate reaching 64%<sup>12</sup> by the  
171 end of the study period. The hybrid model was used to relate the ecological model prevalence to  
172 the wastewater data. The ecological model, *SVI<sub>2</sub>RT*, tracked longitudinally the proportions of  
173 individuals who were susceptible (*S*), vaccinated (*V*), infected with non-Delta (*I*<sub>1</sub>), and Delta  
174 variant (*I*<sub>2</sub>), recovered (*R*), or seropositive (*T*). The model is described in more detail in the  
175 Supplemental Material section S3. We note that a version of this model that did not account for  
176 vaccination or mutation was considered in our earlier work.<sup>2</sup>

177  
178 *2.4.1 Regression model for wastewater concentration of SARS-CoV-2*

179 Upon estimating the parameters in the *SVI<sub>2</sub>RT* model, we compared the model-calculated  
180 prevalence estimates for SARS-CoV-2 infections and vaccination levels with the wastewater  
181 concentration levels of SARS-CoV-2 (N1) normalized by pepper mild mottle virus (PMMoV).<sup>13</sup>  
182 Bayesian linear regression was performed both on the county aggregated data and stratified by  
183 sub-community wastewater treatment plant zones (sewersheds). To improve the regression  
184 model stability, we used weekly average prevalence counts from the *SVI<sub>2</sub>RT* model as the  
185 explanatory variable, and weekly aggregated average wastewater concentrations as the single  
186 outcome variable. We assigned non-informative priors to all regression parameters. Specifically,  
187 the non-informative Cauchy distribution was assigned to regression coefficients, and the non-  
188 informative gamma prior was assigned to the dispersion parameter error term.

189 *2.4.2 Estimating vaccination, strain mutation and hospitalization effects*

190 The strong statistical significance of the regression model relating prevalence and wastewater  
191 concentration allowed for indirect estimation of the effect of population vaccination and virus  
192 mutation. Under the assumption the relationship between the wastewater concentration and the  
193 prevalence is not confounded by the vaccination and mutation process, we used the original  
194 regression equation derived from the collected wastewater and seroprevalence data to estimate  
195 the wastewater concentrations over time. To estimate the vaccination effect, we compared these  
196 concentrations with hypothetical ones obtained when the vaccination term was zeroed out in the  
197  $SVI_2RT$  model. In a comparable manner, we estimated the effect of the introduction of the Delta-  
198 variant. Finally, we performed the longitudinal, regression-based analysis relating the  
199 community hospitalization to observed wastewater concentrations. In all three analysis we  
200 quantified the effects by calculating the size of the effects relative to the factual (observed)  
201 states.

202

203 *2.4.3 Competing risk model with two different virus strains*

204 Wastewater samples were prepared for whole genome sequencing<sup>11, 14</sup>, and the proportion of  
205 observed SARS-CoV-2 variants was estimated for each sewershed based on the frequency of  
206 mutations specific to each variant.

207

208 Two variants were present in the study area during the study period: Alpha was dominant April  
209 to July, while Delta was dominant July and August.<sup>11, 14</sup> To reflect the infections before and after  
210 the emergence of the Delta variant, we incorporated into our  $SVI_2RT$  model two different  
211 infection compartments ( $I_1$  and  $I_2$ ) reflecting the infection competition between two different  
212 strains of the virus.

213

214 *2.5 Ethics*

215 For the seroprevalence and data provided by the LMPHW under a Data Transfer Agreement, the  
216 University of Louisville Institutional Review Board approved this as Human Subjects Research  
217 (IRB number: 20-0393). For the wastewater data, the University of Louisville Institutional  
218 Review Board classified this as non-human subjects research (reference #: 717950).

### 219 3. Results

#### 220 3.1 Wastewater regression

221 The results of Bayesian regression analysis relating the prevalence estimated from the  $SVI_2RT$   
222 model, and the observed wastewater levels, both in aggregation and by sewershed area, show a  
223 significant trend that is well summarized by the corresponding posterior regression line.  
224 Normalized SARS-CoV-2 by PMMoV provided more reliable and stable longitudinal  
225 concentration readings than using SARS-CoV-2 N1 concentration alone. For the aggregate  
226 model, the estimated intercept is  $5.563 \times 10^{-4}$  (CI= $(-9.903 \times 10^{-4}, -1.250 \times 10^{-4})$ ) and the slope is  
227 0.453 (CI= $(0.374, 0.529)$ ). Overall, we see the regression model fits well with  $R^2=0.909$ . See  
228 Supplemental Material Figure S3.2 and S3.3.

229

#### 230 3.2 Effect of vaccination on disease incidence and wastewater concentration

231 We first compared the estimated incidence of the  $SVI_2RT$  model under two different vaccination  
232 scenarios (observed 64% vaccination rate and counter-factual 0% vaccination rate) while  
233 adjusting for the Delta variant emergence (Figure 1). The peak and the overall temporal  
234 dynamics are different under the two scenarios across each location. To better quantify these  
235 differences, we calculated the location-specific vaccination effects as the ratios of the areas under  
236 two scenario curves (with-vaccination area over without-vaccination area). The value obtained  
237 for the aggregated data was 0.429 (CI= (0.405, 1)), with the remaining sewershed specific effects  
238 being even stronger at (Figure 1; panels B–D) 0.532 (CI= (0.515, 1)), 0.367 (CI= (0.366, 0.785)),  
239 and 0.555 (CI= 0.555, 1)), respectively. Based on converting these ratios to excess incidence, we  
240 conclude that without vaccination, we would expect to see the incidence increase of about 133%  
241 above the observed level in Jefferson County (panel A) and about 88%, 172%, and 80% in  
242 respective sewershed areas (Figure 1; panels B–D, see also S3).

243

244 To obtain estimates of the vaccination effects on the wastewater concentrations, we developed a  
245 hybrid inferential model combining the wastewater regression (see Sec 3.1) equation with the  
246  $SVI_2RT$  estimated prevalence, under two different vaccination scenarios (factual 64% rate and  
247 counter-factual 0% rate) (Figure 2). Note that the usage of  $SVI_2RT$  (which accounts for the effect  
248 of different virulence of the two different SARS-CoV-2 strains) automatically adjusted our  
249 analysis for the Delta variant emergence. As the estimated prevalence from the  $SVI_2RT$  model  
250 and the normalized wastewater concentration are highly correlated (see Sec 3.1), the hybrid  
251 model is seen to fit data well. As before, to quantify the location-specific vaccination effects, we  
252 calculated the location-specific ratios under two curves in an analogous way as when quantifying  
253 the vaccination effect on the disease incidence. The ratios of the areas under the two curves,  
254 under factual (vaccinated) and counterfactual (unvaccinated) scenarios, were computed. The  
255 Jefferson County (Figure 2; panel A) ratio was equal to 0.358 (CI= (0.333, 0.381)), and the  
256 remaining sewershed area ratios (Figure 2; panels B–D) were equal to, respectively, 0.457 (CI=  
257 (0.388, 0.537)), 0.276 (CI= (0.260, 0.296)), and 0.426 (CI= 0.407, 0.446)). The estimate of  
258 excess wastewater virus without vaccination is estimated as 179%, 119%, 262%, and 135%,  
259 respectively (Supplemental material section S3).

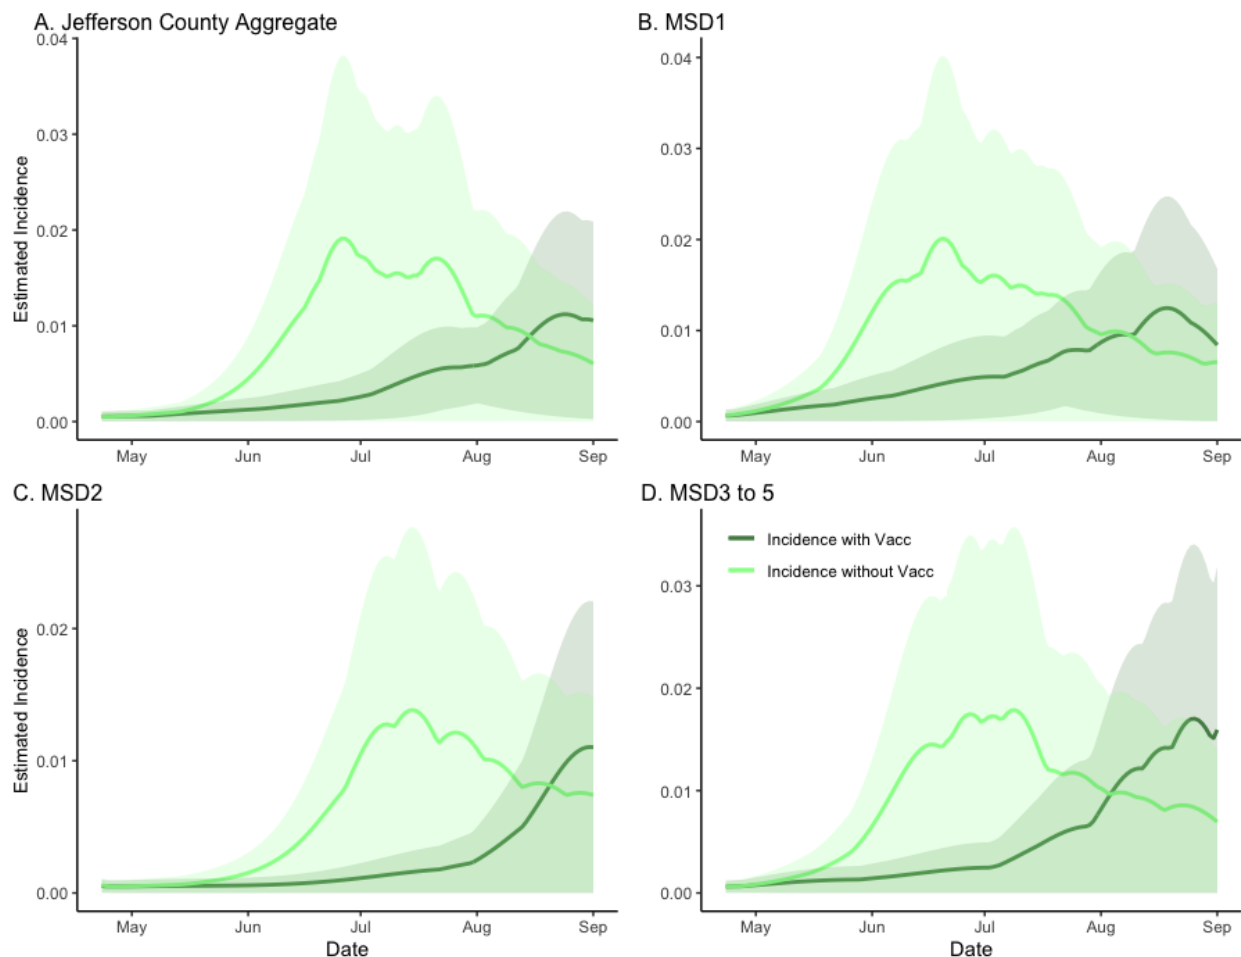

260  
261 **Figure 1. The estimated effect of vaccination on incidence in sewersheds of Jefferson**  
262 **County, KY (USA).** The dark green line is the factual  $SVI_{2RT}$  model estimated incidence (with  
263 vaccination), and the light green line is the corresponding counter-factual estimated incidence  
264 with vaccination effect zeroed out. The shaded areas represent 95% credible intervals. The  
265 panels compare the vaccination effect in Jefferson County (Panel A) as well as stratified by  
266 sewershed (Panels B–D).



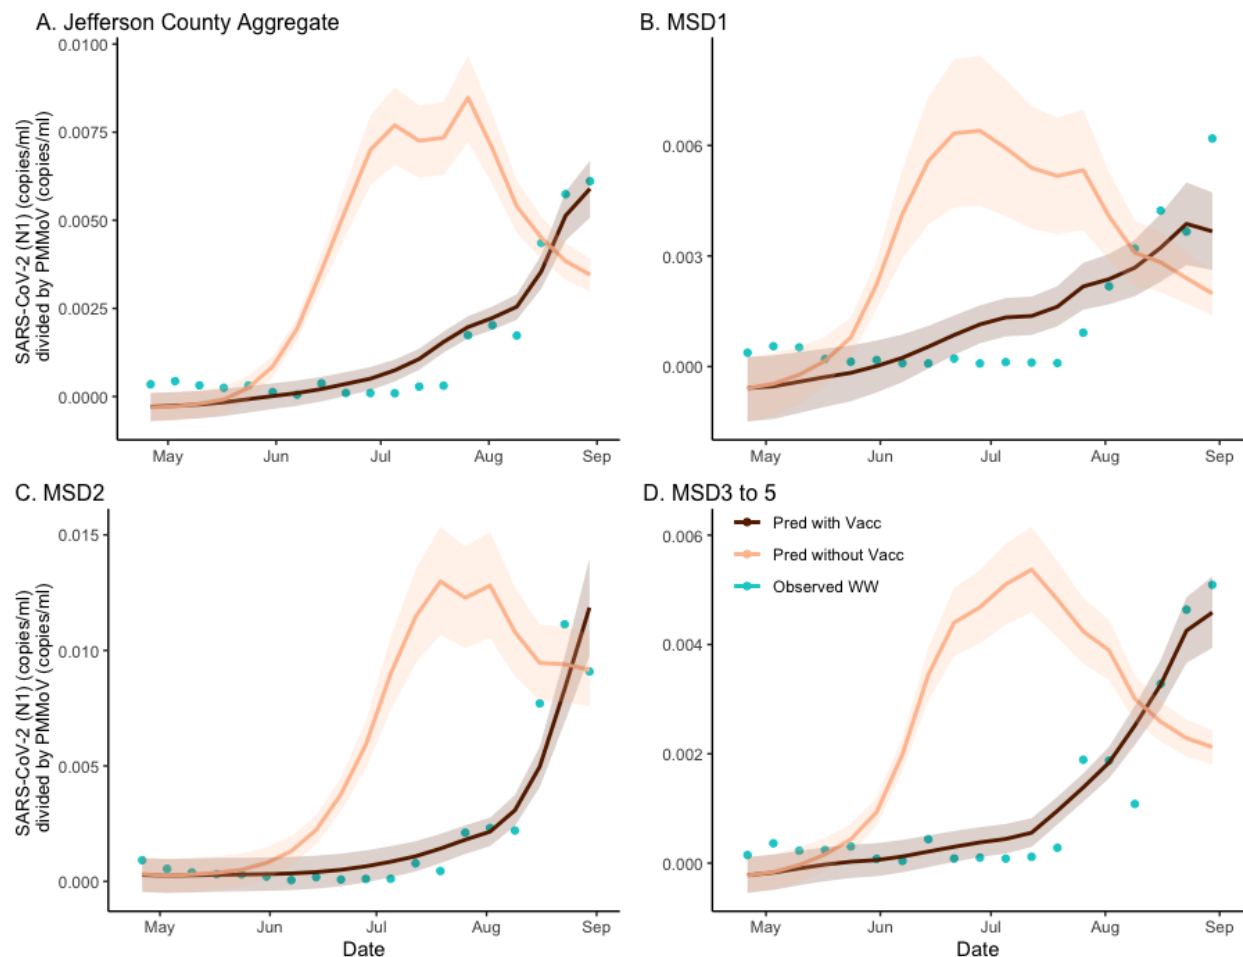

267  
268 **Figure 2. The estimated effect of vaccination on SARS-CoV-2 wastewater concentration**  
269 **normalized by pepper mild mottle virus in sewersheds of Jefferson County, KY (USA).** The  
270 deep brown line is the regression-based fit to the wastewater concentration data and the light  
271 brown line is the prediction of wastewater concentration using synthetic prevalence from  
272 model with vaccination effect zeroed out. The shaded areas represent 95% credible  
273 intervals. The blue dots are observed weekly average wastewater concentrations. The panels  
274 compare the vaccination effect on wastewater concentration for Jefferson County (Panel A) as  
275 well as stratified by sewer shed (Panels B–D).

### 276 3.3 Effects of virus mutation on disease incidence and wastewater concentration

277 The time periods during which the Alpha and Delta variants were dominant in each sewershed  
278 are shown in Table S4.1. The onset of Alpha as the dominant variant simultaneously  
279 occurred at each site on 3/30/21 and lasted a variable number of weeks before dying out and  
280 eventually becoming replaced by Delta. However, Delta had a more gradual introduction into the  
281 sewersheds, beginning as the dominant variant on 7/12/21 in two of the sites and not showing up  
282 as the dominant variant in one of the sites until two weeks later. Our gradual linear switch from  
283 Alpha to Delta is similar to observations in other wastewater data, including a study of 94 sites  
284 within Austria.<sup>22</sup> Interestingly, Delta's dominance as the major variant ended simultaneously on  
285 8/30/21 in all five sites, prior to the later emergence of Omicron in the sewersheds in December  
286 2021. More recently, we have reported on the re-emergence of Delta in the MSD03 site  
287 specifically during the Omicron wave,<sup>14</sup> which indicates the persistence of specific variants in  
288 wastewater can be variable in nature, and are likely influenced by a number of factors, including  
289 incidence and vaccination rates.

290  
291 In the analysis, we assumed a 20% higher infectivity of the SARS-CoV-2 Delta variant as  
292 compared to its Alpha predecessor.<sup>15</sup> In the counterfactual model (light curve), where only the  
293 Alpha variant was present, the epidemic was seen to dissipate, indicating the basic reproduction  
294 number less than one. This was in stark contrast with the factual, full  $SVI_2RT$  model fit (with  
295 both Alpha- and Delta- variants present), where the incidence (dark curve) was seen to rise  
296 rapidly (Figure 3). As in the previous section, to quantify the difference between the two curves,  
297 which we interpret as measuring the effect of introducing the Delta mutation, we calculated the  
298 ratio of areas under the two curves in each panel, obtaining the values of 7.32 (CI = (7.05,  
299 20.13)), 4.40 (CI = (4.33, 7.64)), 8.58 (CI = (1, 8.60)), and 6.15 (CI = (1, 6.16)) for the aggregate,  
300 MSD1, MSD2, and MSD3–5 regions respectively (corresponding to panels A–D). The estimate  
301 of the decrease in total incidence without mutation is found as 86%, 77%, 88%, and 84%,  
302 respectively.

303  
304 To identify the effect of the Delta variant emergence on the observed wastewater concentration,  
305 we again applied the hybrid model discussed in the previous section. In the current analysis, the  
306 regression model was applied to predict the longitudinal wastewater concentrations from both  
307 factual (both variants present) and counterfactual prevalence data (no Delta variant). The results  
308 are depicted in the panels of Figure 4 both for the aggregated and sewershed-specific analysis.  
309 As with the analysis of the vaccination effects, here we also considered the ratios of areas under  
310 the corresponding curves as measures of Delta variant effects in specific locations. Based on the  
311 location-specific ratio values of 12.569 (CI = (11.487, 13.914)), 6.235 (CI = (5.290, 7.891)),  
312 14.932 (13.351, 16.898), and 8.413 (CI = (7.654, 9.351)), corresponding to aggregated and  
313 sewershed-specific curves, the estimate of excess wastewater virus due to Delta mutation is  
314 founded as 92%, 84%, 93%, and 88% respectively. Further analysis is provided in Supplemental  
315 Material Table S3.3.

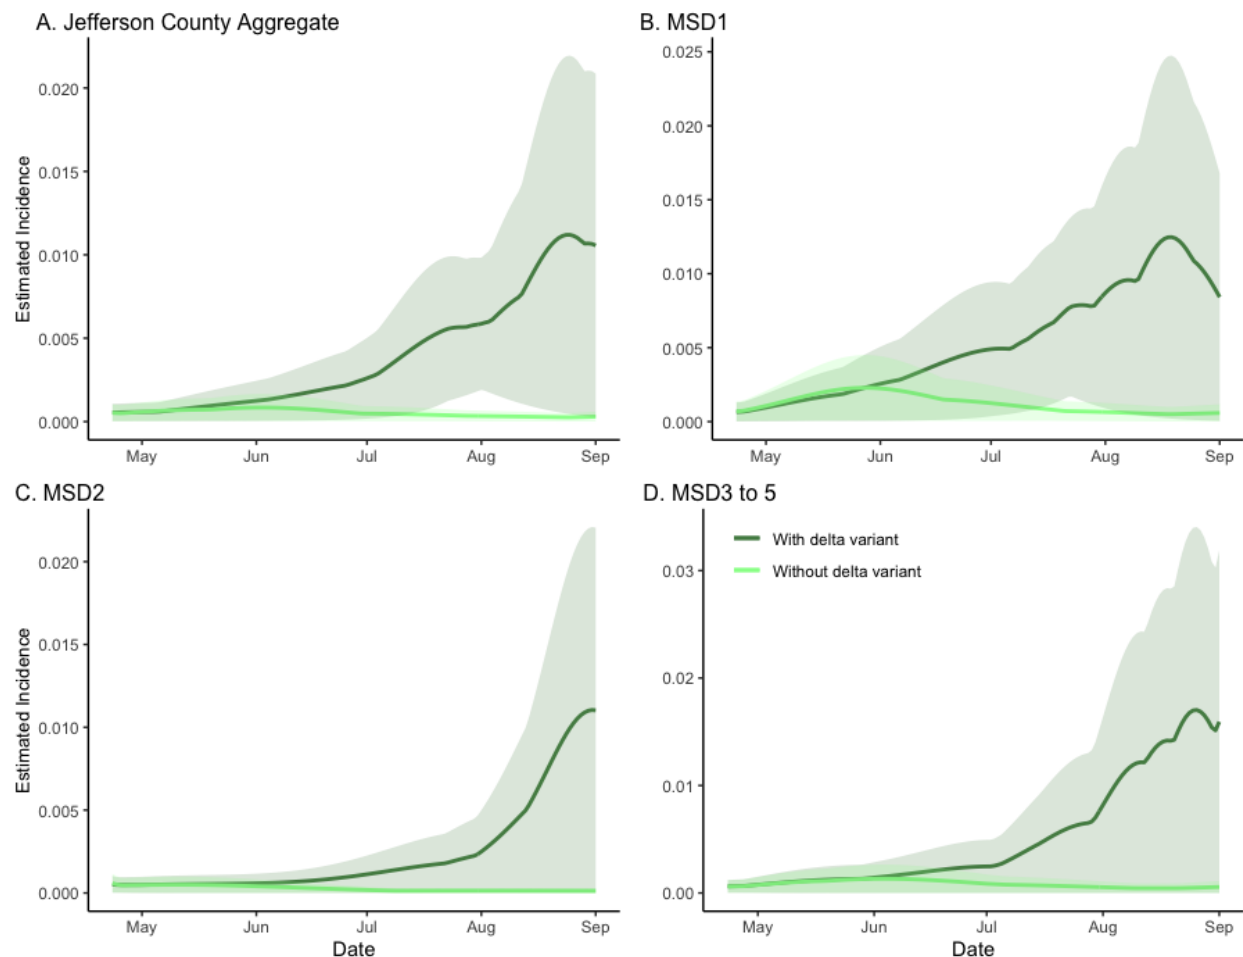

316  
317 **Figure 3. The model-based analysis of the Delta-variant effect on SARS-CoV-2 incidence**  
318 **rate estimates in sewersheds of Jefferson County, KY (USA).** The dark green line is the  
319 estimated factual full model incidence (both Alpha and Delta variants present), and the light  
320 green line is the counterfactual incidence estimated from the model with no Delta variant. The  
321 shaded areas represent 95% credible intervals. The panels compare the vaccination effect in  
322 Jefferson County (Panel A) as well as stratified by sewershed (Panels B–D).

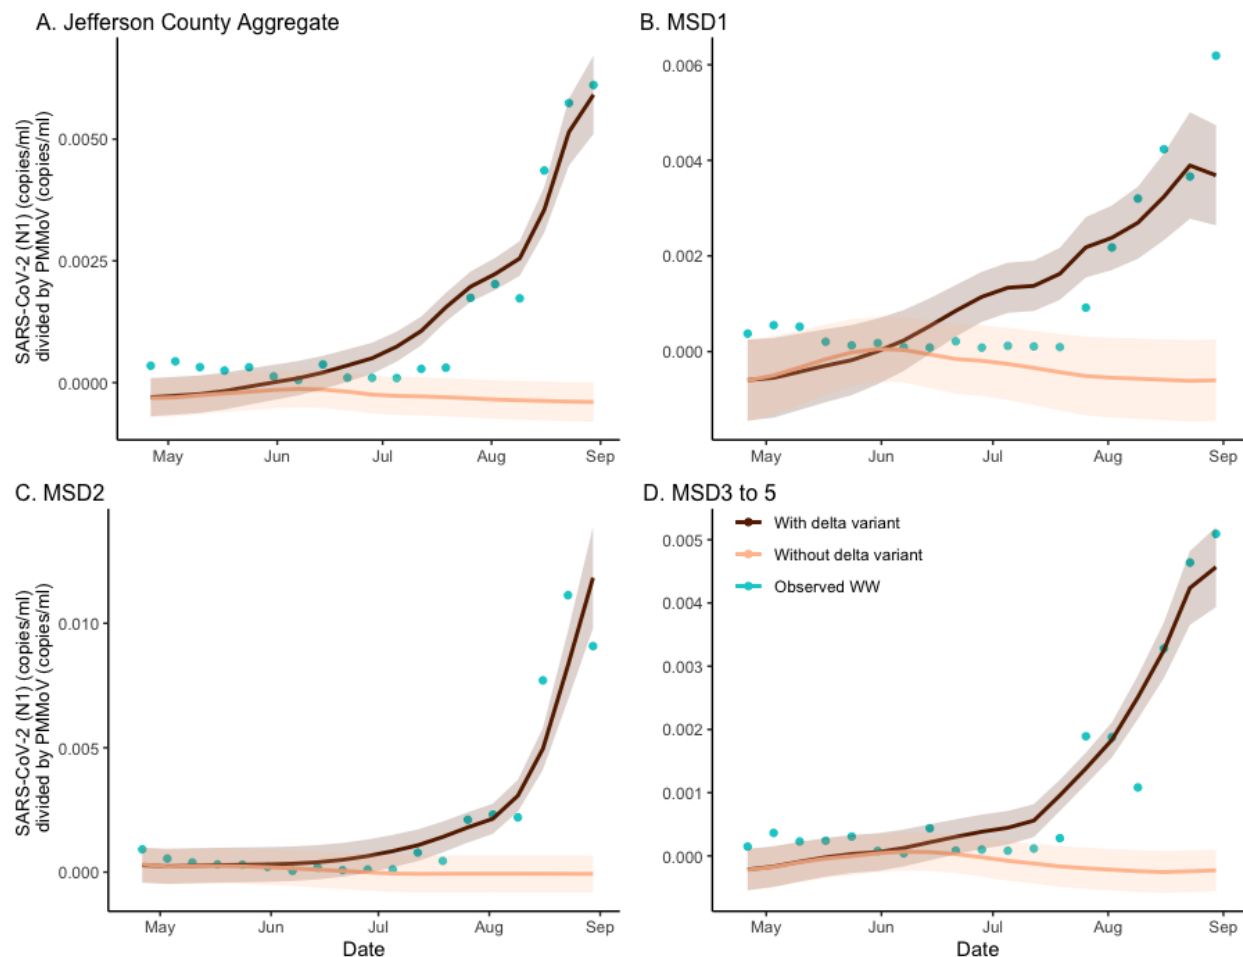

323  
324 **Figure 4. The estimated effect of Delta variant on SARS-CoV-2 wastewater concentration**  
325 **normalized by pepper mild mottle virus in sewersheds of Jefferson County, KY (USA).**  
326 The deep brown line is the regression-based fit to the wastewater concentration and the light  
327 brown line is the prediction of wastewater concentration using synthetic prevalence from the  
328 model with the Delta variant effect zeroed out. The shaded areas represent 95% credible  
329 intervals. The blue dots are observed weekly average wastewater concentration. The panels  
330 compare the mutation effect on wastewater concentration for Jefferson County (Panel A) as well  
331 as stratified by sewershed (Panels B–D).

332 *3.4 Forecasting hospitalization rates based on wastewater concentrations*

333 Hospitalization estimates under both vaccinated (64% vaccination rate) and unvaccinated (0%  
334 vaccination rate) scenarios were obtained by applying a hierarchical regression model where we  
335 first regressed wastewater concentration on the  $SVI_2RT$  model prevalence and then regressed  
336 hospitalization counts on the wastewater concentrations (Figure 5). As hospitalization is likely to  
337 occur sometime after symptom onset, we used the 1-week lagged-regression model where the  
338 length of the lag was based on the overall model fit criteria. The fitted intercept and slope  
339 coefficients were  $1.284 \times 10^{-4}$  (std= $2.279 \times 10^{-5}$ ) and 0.176 (std=0.0119) for vaccinated and  
340 unvaccinated scenarios respectively, with the R-square of 0.928. The maximal number of the  
341 observed daily average hospitalizations under vaccination scenario was 110.4 per weekly  
342 average (actual 122.0 in daily) at the end of August. However, without vaccination, the  
343 maximum predicted number of weekly average hospitalizations increased to 150.3. The ratios  
344 between the areas under the prediction curves with and without vaccination were 0.368 (CI =  
345 (0.413, 0.458)), indicating a 170% increase in the number of hospitalizations when no vaccine  
346 would be present. In a comparable way, we obtained the hospitalization estimate without the  
347 Delta variant mutation. The ratio of the areas under the two graphs (with and without the Delta  
348 variant mutation) is 2.632 (CI = (2.382, 5.573)), indicating a 62% decreasing in the  
349 hospitalization rate.

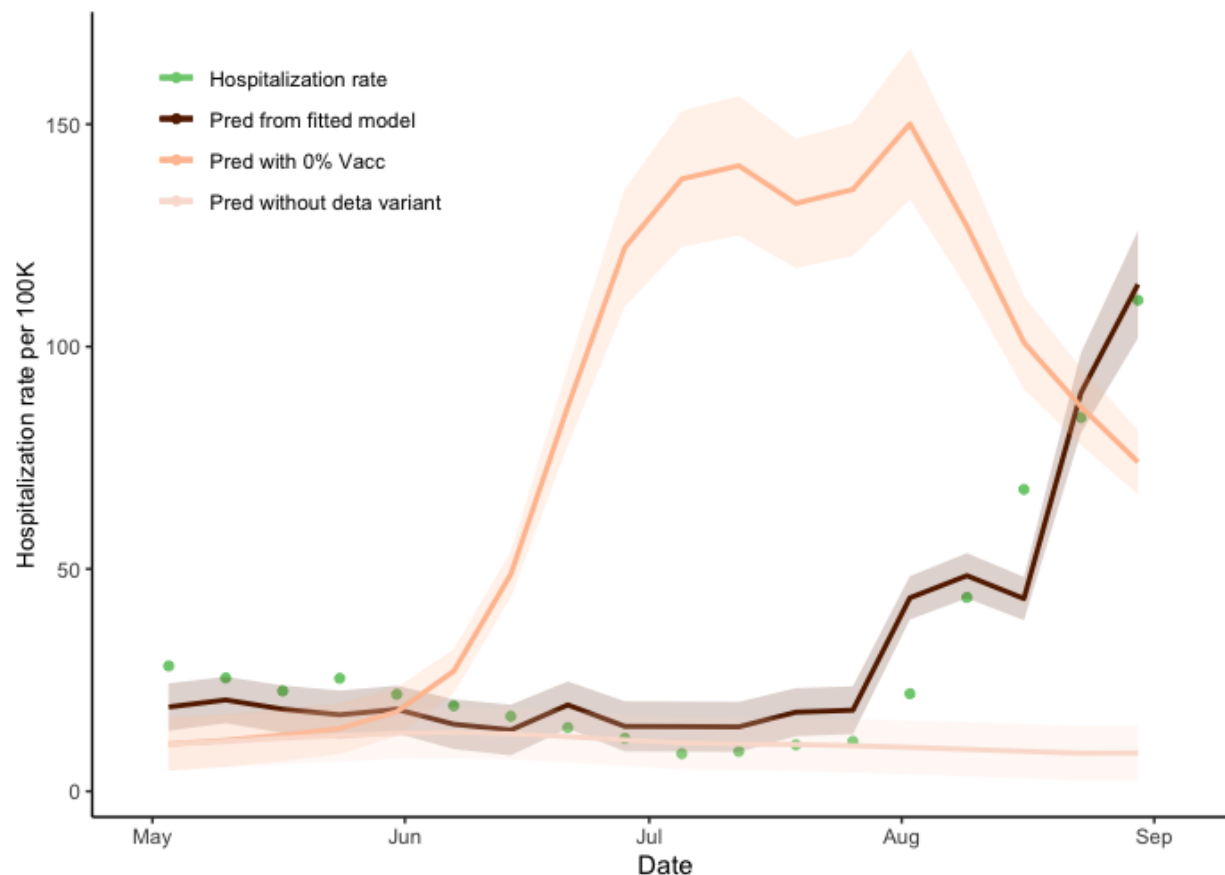

350  
351 **Figure 5. Time lag-dependent analysis of the relationship between hospitalization rate and**  
352 **wastewater concentration, Jefferson County, KY (USA).** Predictions and 95% confidence  
353 intervals of hospitalization rate regressed on week-lagged variables of the weekly average of  
354 wastewater concentration according to the changes of the vaccination proportion of the  
355 community. The dark line represents the prediction using the observed wastewater  
356 concentrations with 64% of community vaccination. The lighter line represents the prediction  
357 using the wastewater concentrations obtained from the model under zero community vaccination.  
358 The lightest line represents the prediction under the counterfactual modified model with  
359 the Delta-infected model compartment zeroed-out (no Delta variant present). The green dots  
360 represent the weekly average of the observed hospitalization rate. The ratios of the areas between  
361 the prediction from the fitted model and of no vaccination are 0.368, and in the absence of the  
362 Delta variant is 2.63, respectively.

## 363 Discussion

364 The results of our large study (N=3436) have shown the importance of environmental  
365 surveillance post-vaccine in urban and sub-urban areas; removing bias of publicly available  
366 clinical case data by using antibody positivity with four waves of sequential community-wide  
367 stratified randomized sampling data. Despite our focus on the Jefferson County example, it  
368 should be emphasized the model described here is readily applicable to other locations  
369 worldwide. Although our model was run with both the N1 analysis and adjusted N1 analysis, we  
370 learned the model provided reduced uncertainty with adjustment. Indeed, the vaccination effect  
371 estimates bring the related issue of refined localized model application such as high levels of  
372 tourism that may affect community vaccination levels and related observed wastewater  
373 concentrations.<sup>8</sup> Here we have presented real world evidence that, in fact, wastewater  
374 surveillance may be also used to estimate both the effects of a community intervention, like the  
375 vaccination campaign and the effects of disease evolution, and emergence of a new viral strain  
376 mutation.

377  
378 The COVID-19 vaccine has been highly effective.<sup>16,17</sup> There is a need for increased reliance on  
379 wastewater as a proxy for community disease impact being built from actual community level  
380 data over time for other vaccine preventable diseases affecting human health. When 90% of the  
381 student population of a college campus was vaccinated, SARS-CoV-2 in wastewater decreased;<sup>4</sup>  
382 but that building level generalization was not replicated in our community-wide survey over a  
383 longer period. In contrast to our findings, Nourbakhsh et al.<sup>18</sup> found dissimilar trajectories from  
384 clinical and wastewater data ratios once vaccination was introduced. We suspect this difference  
385 is explained by the bias of relying on clinical data and home testing kits which became more  
386 widely available for the studied period when compared to earlier in the pandemic and with no  
387 requirement, or in some cases option, for reporting. Whereas the Nourbakhsh et al.<sup>18</sup> study  
388 included only publicly reported case data, the randomized selection of community participants in  
389 our study population were a comparatively less biased data source for this post-vaccine period.

390  
391 Our model compares to the work of Jiang et al.<sup>19</sup> in that our analysis also provided estimates of  
392 prevalence, however our estimates are based on a statistical random sample (not a clinical  
393 sample) and our regression model has a simple and explicit formula relating prevalence to  
394 observed wastewater concentrations. Our model further confirms the findings in Hegazy et al.<sup>6</sup>  
395 implying the Delta variant emergence has strengthened the relationship between wastewater and  
396 hospitalization rates. Our analysis provides a further proof of concept that our wastewater  
397 regression model could be used (after proper calibration) with other similar data to provide  
398 surrogate measures of SARS-CoV-2 prevalence in the community without the necessity for  
399 individual testing. The regression prediction correlates well with the estimated prevalence with a  
400 correlation coefficient of 0.916 (CI = (0.764, 0.976)). The hospital burden findings of Wang et  
401 al.<sup>20</sup> also compared well to our work; our results showed access to a voluntary community  
402 vaccine that reached a coverage level of 64% of the adult population decreased community  
403 hospitalizations by approximately 170%.

404  
405 Yaniv et. al<sup>5</sup> described the emergence of peaks of positivity rates, showing they corresponded to  
406 introduction of new variants. In addition, they noted how vaccination rates and a second booster  
407 helped to control Alpha, while an increase in a third booster was found to lead to a decline in  
408 Delta. When vaccination levels increase to higher coverage, overall reported incidence may

409 decline, even though the levels in wastewater remain high.<sup>7</sup> This leads to the hypothesis that  
410 circulation among vaccinated individuals creates a level of selective pressure making variants  
411 with transmission and vaccine escape more advantageous. In our wastewater data, we find in  
412 periods of decline for a specific variant we see more diversity in the overall mutations, indicating  
413 both a selection against the variant in decline (typically due to vaccinations and boosters), and a  
414 similar advantageous selection for emerging variants.

415  
416 Our study used five sub-community scales based on the existing wastewater infrastructure  
417 allowing observation of regional trends but also the aggregation of data for a countywide picture.  
418 We found the antibody positivity varied by the sewershed. The antibody-positive individuals  
419 were lowest in sewershed MSD1 and highest in sewershed MSD3–5 (10.0% for aggregate, 8.6%  
420 for MSD1, 9.2% for MSD2, and 12.0% for MSD3–5), indicating previous infection may have  
421 been higher in the rural portions of the county compared to the urban core. There are many  
422 factors differentiating these sewershed areas that could have produced these differences. These  
423 include population sizes and demographics, or presence of stormwater or industrial discharge  
424 being combined with household sewer water. These differences between MSD1 to 5 provide  
425 evidence of the benefit of observing results at a sub-county level, rather than only considering  
426 MSD1 representing the urban core and the largest sewershed zone.

427  
428 The trajectory of the pandemic and public health response would benefit from new methods less  
429 dependent on continuous individual clinical testing. For replication of this SARS-CoV-2 model,  
430 wastewater sampling, stratified random sampling of seroprevalence, and spatially linked  
431 vaccination data are required; the model is flexible enough to allow additional variant-specific  
432 variables. The promise of this model is if we just have wastewater concentration, we can we  
433 predict the effect of vaccination and allow fine-tuned, and milestone driven, public health  
434 response. Our model also provides a further positive response for public health offices of the  
435 significant role of the vaccine, our competition model shows the epidemic would have been  
436 bigger and earlier without vaccine access.



#### 437 **4. Limitations**

438 Our study has several limitations. The proportion of vaccinated respondents was larger than the  
439 greater community (~90% vs. 64%) reflecting that even a probability-based sample relies on  
440 volunteer participants and vaccinated individuals may also have different health-research  
441 behaviors. Vaccine information was self-reported. Natural infection of a combined vaccinated  
442 and unvaccinated population (and in the absence of another way to verify vaccination) was based  
443 on antibody titers of IgG N, an assay that has 65% sensitivity and 85% specificity, with  
444 inevitable under-estimation of infection prevalence. While our serosurvey only captured adults,  
445 wastewater testing included minors. COVID-19 infected individuals can in rare instances shed  
446 fecal SARS-CoV-2 RNA up to 7 months post diagnosis;<sup>21</sup> viral shedding of each SARS-CoV-2  
447 variant in relation to days after vaccination, or whether a primary or booster series had been  
448 taken, is not well defined as the vaccination series guidance extends during the pandemic and  
449 thus was not included in our model.

450

#### 451 **5. Conclusion**

452 Our work indicates it is possible in certain conditions to use wastewater-based epidemiology to  
453 assess both the immunity acquisition in the community due to natural recovery and vaccination  
454 as well as the effect of new variants emergence and associated immune evasion to the currently  
455 available COVID-19 vaccines. The effects of vaccination on wastewater concentration as well as  
456 on community incidence of SARS-CoV-2 was substantial in Jefferson County. According to our  
457 analysis, without vaccination one would expect about 133% of excess infections over the period  
458 of study, which corresponds to a 179% of excess wastewater concentration. The effect of Delta  
459 mutation was similarly substantial. We estimated, over the study period in Jefferson County,  
460 without Delta mutation the amount of overall infection would decrease on average by 86% which  
461 corresponds to a 92% decrease in wastewater N1 normalized by PMMoV concentration. The  
462 correspondence between wastewater concentration and the number of hospitalizations was found  
463 to be strongest with the time lag for about 7 days and correlation = 0.963. Based on the  
464 regression model we estimated the effects of vaccination and mutation on hospitalization rate.  
465 According to the model, without vaccination one would expect about 171% increase and without  
466 mutation about 62% decrease in hospitalization rate. Using the fitted regression model for  
467 hospitalization, the predictions of hospitalization rates are at 50, 100, and 150 per 100K when the  
468 normalized wastewater concentrations are 0.0021, 0.0050, and 0.0078 N1 normalized by  
469 PMMoV, respectively. Our large, randomized, serosurvey suggests using the mechanistic,  
470 population level, vaccination model ( $SVI_2RT$ ) coupled with longitudinal wastewater sampling  
471 estimated the effect of vaccination on the prevalence rate in the community over the period of  
472 several months during the second and third wave of COVID-19 pandemic, in the absence of  
473 clinical data. The model can also be used to estimate the effects of vaccination and new variants  
474 emergence on the hospitalization rate and on peak hospital beds utilization.

475 Declaration of interests:

476 The authors declare that they have no known competing financial interests or personal  
477 relationships that could have appeared to influence the work reported in this paper.

478

479 Acknowledgements:

480 We thank the Louisville/Jefferson County Metropolitan Sewer District for their valuable  
481 collaboration in wastewater sample collection.

482

483 Contributors:

484 AB, TS, KEP, and RK conceived and developed the idea for the study. KEP supervised the  
485 serology assays; ABS and KK performed the serology assays, performed quality control  
486 assessments, and uploaded the data to the redcap database. TS and RH supervised the wastewater  
487 analyses. GAR and BC performed the model-based data analyses. RHH and GAR wrote the first  
488 draft of the manuscript with all authors contributing to the interpretation of data and critical  
489 revision of the article. MB accessed and verified the data reported in the study. All authors had  
490 full access to all the data in the study and had final responsibility for the decision to submit for  
491 publication.

492

493 Data sharing:

494 The seroprevalence, wastewater concentration, and hospitalization information data used in the  
495 study can be accessed from the website [https://github.com/cbskust/DSA\\_Seroprevalence](https://github.com/cbskust/DSA_Seroprevalence). The  
496 computer code that implemented our model-based analysis will be made available immediately  
497 after publication.

498 **References**

- 499 1 Li X, Zhang S, Sherchan S, et al. Correlation between SARS-CoV-2 RNA concentration  
500 in wastewater and COVID-19 cases in community: A systematic review and meta-  
501 analysis. *J Hazard Mater* 2023; **441**: 129848. doi:10.1016/j.jhazmat.2022.129848
- 502 2 Smith T, Holm RH, Keith RJ, et al. Quantifying the relationship between sub-population  
503 wastewater samples and community-wide SARS-CoV-2 seroprevalence. *Sci Total*  
504 *Environ* 2022; **853**: 158567. doi:10.1016/j.scitotenv.2022.158567
- 505 3 Berchenko Y, Manor Y, Freedman LS, et al. Estimation of polio infection prevalence  
506 from environmental surveillance data. *Sci Transl Med* 2017; **9**(383): eaaf6786.  
507 doi:10.1126/scitranslmed.aaf6786
- 508 4 Bivins A, Bibby K. Wastewater surveillance during mass COVID-19 vaccination on a  
509 college campus. *Environ Sci Tech Let* 2021; **8**(9): 792–8. doi:10.1021/acs.estlett.1c00519
- 510 5 Yaniv K, Ozer E, Lewis Y, Kushmaro A. RT-qPCR assays for SARS-CoV-2 variants of  
511 concern in wastewater reveals compromised vaccination-induced immunity. *Water Res*  
512 2021; **207**: 117808. doi:10.1016/j.watres.2021.117808
- 513 6 [preprint] Hegazy N, Cowan A, D’Aoust PM, et al. Understanding the dynamic relation  
514 between wastewater SARS-CoV-2 signal and clinical metrics throughout the pandemic.  
515 *medRxiv* 2022. doi:10.1101/2022.07.06.22277318
- 516 7 Nattino G, Castiglioni S, Cereda D, et al. Association between SARS-CoV-2 viral load in  
517 wastewater and reported cases, hospitalizations, and vaccinations in Milan, March 2020  
518 to November 2021. *JAMA* 2022; **327**(19): 1922–4. doi:10.1001/jama.2022.4908
- 519 8 Rainey AL, Loeb JC, Robinson SE, et al. Wastewater surveillance for SARS-CoV-2 in a  
520 small coastal community: effects of tourism on viral presence and variant identification  
521 among low prevalence populations. *Environ Res* 2022; **208**: 112496.  
522 doi:10.1016/j.envres.2021.112496
- 523 9 Bilal U, Tabb LP, Barber S, Diez Roux AV. Spatial inequities in COVID-19 testing,  
524 positivity, confirmed cases, and mortality in 3 US cities: an ecological study. *Ann Intern*  
525 *Med* 2021; **174**: 936–44. doi:10.7326/M20-3936
- 526 10 Hamorsky KT, Bushau-Sprinkle AM, Kitterman K, et al. Serological assessment of  
527 SARS-CoV-2 infection during the first wave of the pandemic in Louisville Kentucky. *Sci*  
528 *Rep-UK* 2021; **11**: 18285. doi:10.1038/s41598-021-97423-z
- 529 11 Rouchka EC, Chariker JH, Saurabh K, et al. The rapid assessment of aggregated  
530 wastewater samples for genomic surveillance of SARS-CoV-2 on a city-wide scale.  
531 *Pathogens* 2021; **10**: 1271. doi:10.3390/pathogens10101271
- 532 12 CDC. COVID-19 Vaccinations in the United States, County. 2022.  
533 <https://data.cdc.gov/d/8xkx-amqh/visualization> (accessed January 5, 2023).
- 534 13 Maal-Bared R, Qiu Y, Li Q, et al. Does normalization of SARS-CoV-2 concentrations by  
535 Pepper Mild Mottle Virus improve correlations and lead time between wastewater  
536 surveillance and clinical data in Alberta (Canada): Comparing twelve SARS-CoV-2  
537 normalization approaches. *Sci Total Environ* 2023; **856**: 158964.  
538 doi:10.1016/j.scitotenv.2022.158964
- 539 14 Westcott CE, Sokoloski KJ, Rouchka EC, et al. The detection of periodic reemergence  
540 events of SARS-CoV-2 Delta strain in communities dominated by Omicron. *Pathogens*  
541 2022; **11**(11): 1249. doi:10.3390/pathogens11111249

- 542 15 Yang, W, Shaman, J. Development of a model-inference system for estimating  
543 epidemiological characteristics of SARS-CoV-2 variants of concern. *Nat Commun* 2021;  
544 **12.1**: 1–9. doi:10.1038/s41467-021-25913-9
- 545 16 Nordström P, Ballin M, Nordström A. Risk of infection, hospitalization, and death up to  
546 9 months after a second dose of COVID-19 vaccine: A retrospective, total population  
547 cohort study in Sweden. *Lancet* 2022; **399**(10327): 814–23. doi:10.1016/S0140-  
548 6736(22)00089-7
- 549 17 Watson OJ, Barnsley G, Toor J, Hogan AB, Winskill P, Ghani AC. Global impact of the  
550 first year of COVID-19 vaccination: A mathematical modelling study. *Lancet Infect Dis*  
551 2022; **22**(9): 1293–302. doi:10.1016/S1473-3099(22)00320-6
- 552 18 Nourbakhsh S, Fazil A, Li M, et al. A wastewater-based epidemic model for SARS-CoV-  
553 2 with application to three Canadian cities. *Epidemics* 2022; **39**: 100560.  
554 doi:10.1016/j.epidem.2022.100560
- 555 19 Jiang G, Wu J, Weidhaas J, et al. Artificial neural network-based estimation of COVID-  
556 19 case numbers and effective reproduction rate using wastewater-based epidemiology.  
557 *Water Res* 2022; **218**: 118451. doi:10.1016/j.watres.2022.118451
- 558 20 Wang H, Churqui MP, Tunovic T, et al. The amount of SARS-CoV-2 RNA in  
559 wastewater relates to the development of the pandemic and its burden on the health  
560 system. *iScience*. 2022; **25**(9): 105000. doi:10.1016/j.isci.2022.105000.
- 561 21 Natarajan A, Zlitni S, Brooks EF, et al. Gastrointestinal symptoms and fecal shedding of  
562 SARS-CoV-2 RNA suggest prolonged gastrointestinal infection. *Med* 2022; **3**(6): 371–  
563 87.e9. doi:10.1016/j.medj.2022.04.001.
- 564 Amman F, Markt R, Endler L, et al. Viral variant-resolved wastewater surveillance of  
565 SARS-CoV-2 at national scale. *Nat Biotechnol* 2022: 1–9. doi:10.1038/s41587-022-  
566 01387-y

## 567 **Supplementary Material**

568 **Table of Contents**

569 S1. SARS-CoV-2 seroprevalence by wave and sewershed, Jefferson County, KY (USA)..... 23

570 S2. Studied wastewater treatment plant zones (sewersheds), Jefferson County, KY (USA). ..... 24

571 S3. Population vaccination model (SVI<sub>2</sub>RT)..... 26

572 S4. Variant detection..... 40

573

574

575 **S1. SARS-CoV-2 seroprevalence by wave and sewershed, Jefferson County, KY (USA).**

576  
577 Table S1. **SARS-CoV-2 seroprevalence by wave and sewershed, Jefferson County, KY**  
578 **(USA).**

|         | Number of unvaccinated participants | Number of vaccinated participants | Number of participants positive for SARS-CoV-2 nucleocapsid (N) specific IgG antibodies | Estimated posterior average seroprevalence per 10 <sup>5</sup> people (95% credible interval) | Estimated posterior average prevalence per 10 <sup>5</sup> people (95% credible interval) |
|---------|-------------------------------------|-----------------------------------|-----------------------------------------------------------------------------------------|-----------------------------------------------------------------------------------------------|-------------------------------------------------------------------------------------------|
| Overall |                                     |                                   |                                                                                         |                                                                                               |                                                                                           |
| MSD1    | 91                                  | 1450                              | 132                                                                                     | 9153 (3772, 14533)                                                                            | 533 (38, 1028)                                                                            |
| MSD2    | 132                                 | 794                               | 81                                                                                      | 5427 (1848, 9006)                                                                             | 336 (0, 672)                                                                              |
| MSD3-5  | 23                                  | 228                               | 17                                                                                      | 8410 (2016, 14804)                                                                            | 588 (0, 1177)                                                                             |
| Total   | 315                                 | 2957                              | 296                                                                                     | 22989 (13898, 32081)                                                                          | 1457 (618, 2296)                                                                          |
| Wave A  |                                     |                                   |                                                                                         |                                                                                               |                                                                                           |
| MSD1    | 26                                  | 363                               | 24                                                                                      | 2249 (1686, 2811)                                                                             | 62 (1, 122)                                                                               |
| MSD2    | 29                                  | 206                               | 25                                                                                      | 2277 (1751, 2803)                                                                             | 49 (0, 97)                                                                                |
| MSD3-5  | 4                                   | 39                                | 5                                                                                       | 2284 (1682, 2887)                                                                             | 53 (1, 106)                                                                               |
| Total   | 68                                  | 697                               | 68                                                                                      | 6810 (5832, 7788)                                                                             | 163 (70, 257)                                                                             |
| Wave B  |                                     |                                   |                                                                                         |                                                                                               |                                                                                           |
| MSD1    | 20                                  | 369                               | 17                                                                                      | 2927 (2042, 3813)                                                                             | 197 (7, 386)                                                                              |
| MSD2    | 40                                  | 192                               | 17                                                                                      | 2611 (1832, 3391)                                                                             | 74 (0, 149)                                                                               |
| MSD3-5  | 7                                   | 53                                | 2                                                                                       | 2952 (1816, 4089)                                                                             | 271 (0, 542)                                                                              |
| Total   | 89                                  | 730                               | 42                                                                                      | 8491 (6853, 10129)                                                                            | 542(203, 881)                                                                             |
| Wave C  |                                     |                                   |                                                                                         |                                                                                               |                                                                                           |
| MSD1    | 16                                  | 308                               | 22                                                                                      | 6261 (2537, 9984)                                                                             | 618 (43, 1193)                                                                            |
| MSD2    | 29                                  | 179                               | 11                                                                                      | 3696 (1860, 5531)                                                                             | 197 (0, 394)                                                                              |
| MSD3-5  | 3                                   | 60                                | 2                                                                                       | 7565 (2048, 13083)                                                                            | 456 (0, 911)                                                                              |
| Total   | 60                                  | 657                               | 46                                                                                      | 17521 (10617, 24426)                                                                          | 1270 (511, 2030)                                                                          |
| Wave D  |                                     |                                   |                                                                                         |                                                                                               |                                                                                           |
| MSD1    | 29                                  | 410                               | 69                                                                                      | 19572 (8999, 30145)                                                                           | 810 (4, 1617)                                                                             |
| MSD2    | 34                                  | 217                               | 28                                                                                      | 12408 (1872, 22943)                                                                           | 834(0, 1668)                                                                              |
| MSD3-5  | 9                                   | 76                                | 8                                                                                       | 14746 (2188, 27304)                                                                           | 1440 (0, 2880)                                                                            |
| Total   | 98                                  | 873                               | 140                                                                                     | 46726 (27220, 66232)                                                                          | 3084 (1235, 4934)                                                                         |

579

580 **S2. Studied wastewater treatment plant zones (sewersheds), Jefferson County, KY (USA).**

581

582

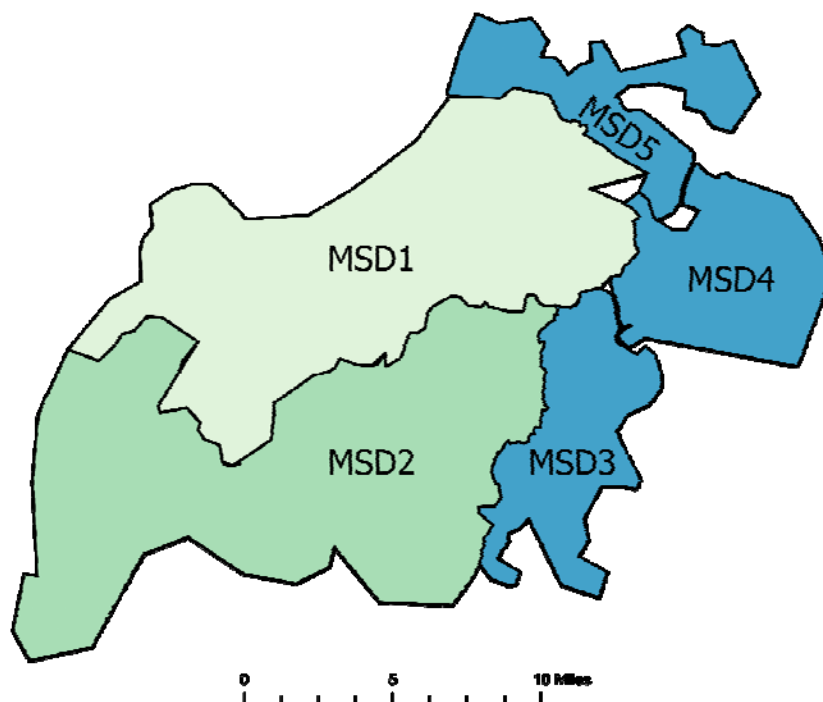

583

584 **Figure S1. Studied wastewater treatment plant sewersheds, Jefferson County, Kentucky**  
585 **(USA).**



586 Table S2. **Characteristics of studied wastewater treatment plant sewersheds of Jefferson**  
587 **County, KY (USA).**

| <b>Site name</b>                                                   | <b>Income (USD\$)<sup>a</sup></b> | <b>Population<sup>a</sup></b> | <b>Area (km<sup>2</sup>)</b> | <b>Combined sewer</b> |
|--------------------------------------------------------------------|-----------------------------------|-------------------------------|------------------------------|-----------------------|
| MSD01<br>Morris Forman Water Quality Treatment Center (MFWQTC)     | 54,138                            | 349,850                       | 280                          | Yes                   |
| MSD02<br>Derek R. Guthrie Water Quality Treatment Center (DRGWQTC) | 53,577                            | 295,910                       | 332                          | No                    |
| MSD03<br>Cedar Creek Water Quality Treatment Center (CCWQTC)       | 76,606                            | 55,928                        | 80                           | No                    |
| MSD04<br>Floyds Fork Water Quality Treatment Center (FFWQTC)       | 113,699                           | 32,460                        | 88                           | No                    |
| MSD05<br>Hite Creek Water Quality Treatment Center (HCWQTC)        | 106,769                           | 31,269                        | 67                           | No                    |

<sup>a</sup> Based on 2018 U.S Census Bureau American Community Survey (ACS). Income is mean median household.

588

589 **S3. Population vaccination model (SVI<sub>2</sub>RT)**

590

591 The equation shown in (1) describes the time-evolution of the proportions of individuals who are  
 592 susceptible ( $S$ ), vaccinated ( $V$ ), infected with Alpha variant ( $I_1$ ), infected with Delta variant ( $I_2$ )  
 593 removed ( $R$ ), and seropositive ( $T$ ). We assume the total initial population of susceptibles is large  
 594 with a small initial fraction of infected. The model equations are

$$\begin{aligned}
 \dot{S}_t &= -\beta S_t I_t^{(1)} - \beta^* S_t I_t^{(2)} - \alpha_t S_t, \\
 \dot{V}_t &= \alpha_t S_t - \tilde{\beta} I_t^{(1)} V_t - \tilde{\beta}^* I_t^{(2)} V_t \\
 \dot{I}_t^{(1)} &= \beta S_t I_t^{(1)} + \tilde{\beta} I_t^{(1)} V_t - \gamma I_t^{(1)}, \\
 \dot{I}_t^{(2)} &= \beta^* S_t I_t^{(2)} + \tilde{\beta}^* I_t^{(2)} V_t - \gamma I_t^{(2)} \\
 \dot{R}_t &= \gamma I_t - \delta R_t, \\
 \dot{T}_t &= \delta R_t,
 \end{aligned} \tag{1}$$

596 with the initial condition  $S_0 = 1 - \rho - \epsilon - \psi > 0, V_0 = 0, I_0^{(1)} = \rho > 0, I_0^{(2)} = \rho/100, R_0 =$   
 597  $\epsilon > 0$ , and  $T_0 = \psi > 0$ .

598

599 Here,  $\beta$  and  $\tilde{\beta}$  are the rates of infection of respectively, unvaccinated and vaccinated, and  $\beta^*$  and  
 600  $\tilde{\beta}^*$  are the rates of infection according to Delta variant. As our compartment model has two  
 601 infection compartments, it is called the variant competition model.<sup>1</sup> The observed data in this  
 602 analysis do not have any information about infection from the Delta variant, and an increase in  
 603 the number of parameters makes model estimation difficult and may lead to identifiability  
 604 problems. So, we set  $\beta^*$  and  $\tilde{\beta}^*$  at the values 20% higher than  $\beta$  and  $\tilde{\beta}$ .<sup>2</sup> The function of  $\alpha_t$   
 605 represents a changing rate of vaccination over time. However, the vaccination process can not  
 606 follow a stochastic process but may be changed according to a policy or vaccine supply, so set  
 607 the vaccination rate  $\alpha(t)$  to match the empirical percentage of the vaccinated population in  
 608 Jefferson County at the end of August 2021. Additionally,  $\gamma$  is the rate of recovery, and  $\delta$  is the  
 609 rate at which antibodies build to a detectable level after recovery. The SVI<sub>2</sub>RT model parameters  
 610 to be estimated are given by the vector  $\theta = (\beta, \tilde{\beta}, \gamma, \delta, \rho, \epsilon, \psi)$ .

611

612 To obtain the serial estimates of incidence and prevalence from the observed seropositivity levels  
 613 in four waves of testing, we adapt the idea of an ODE-based survival model proposed recently.<sup>3,4</sup>

614 According to that model, the scaled quantities  $S_t, V_t, I_t^{(1)}, I_t^{(2)}, R_t, T_t$  may be considered as  
 615 respective probabilities of a randomly selected individual in a large population, being either  
 616 susceptible, vaccinated, infected with different virus variant, recovered, or seroprevalent at time  
 617  $t$ . Consequently, we consider the results  $Z(t)$  of all individual antibody-based tests conducted at  
 618 times  $t$  as independent Bernoulli variables:

$$619 Z(t) \sim \text{Ber}(T_t^*),$$

620 where  $T_t^* = \text{sens}T_t + (1 - \text{spe})(1 - T_t)$  is the specificity adjusted probability of a positive test.

621 For our analysis, both *sens* and *spe* are additional parameters to be estimated. We assigned the  
 622 informative priors to *sens* and *spe* from available clinical data.

623

624 Assuming at time  $t$ ,  $n_t$  individuals are tested with  $k_t$  having positive results, the corresponding  
 625 log-likelihood function is

626  $\ell_t(\theta) \propto k_t \log(T_t) + (n_t - k_t) \log(1 - T_t), (2)$

627 where  $\theta = (\beta, \tilde{\beta}, \gamma, \delta, \rho, \epsilon, \psi, spe, sens)$  is the vector of parameters to be identified.

628 Given the testing data at  $m \geq 1$  time points  $t_1, \dots, t_m$ , we then aim to find parameter values  $\theta$   
629 that maximizes the posterior log-likelihood function

630  $\tilde{\ell}(\theta) \propto \sum_{i=1}^m \ell_{t_i}(\theta) + \log p(\theta), (3)$

631 where  $p(\theta)$  is the prior distribution on  $\theta$  to be determined from our previous work.<sup>3</sup> Hence, we  
632 seek the values of  $\theta$  that maximize our posterior log-likelihood function (3). Note the entire  
633 system (1) must be solved for each parameter combination.

634

### 635 *S3.1 Incidence, prevalence, and seroprevalence estimation*

636 Posterior serial estimates of the relative rates of incidence, prevalence, and seropositivity were  
637 obtained from the *SVI<sub>2</sub>RT* model as the time-dependent vector

638  $\text{Pred}_t = (-\dot{S}_t, V_t, I_t^{(1)}, I_t^{(2)}, T_t). (4)$

639 Here  $(S_t, V_t, I_t^{(1)}, I_t^{(2)}, T_t)$  is the family of trajectories of (1) evaluated at the posterior distribution  
640 of the vector  $\theta$ . In practice, the distribution of  $\text{Pred}_t$  is approximated by taking a random sample  
641 of size  $m$  from the converged MCMC sampler. In our case  $m = 2000$ . To obtain daily incidence  
642 rates ( $\text{Inc}_d$ ) we have used the approximation  $\dot{S}_t \approx S_{t+1} - S_t$  and consequently took  $\text{Inc}_d = S_d -$   
643  $S_{d+1}$  where  $d$  corresponds to a specific day of interest. The estimated prediction counts were  
644 obtained by multiplying the rates in  $\text{Pred}_t$  by the appropriate population numbers.

645 Table S3.1. **Posterior mean estimates of the  $SVI_2RT$  model parameters in sewersheds of**  
 646 **Jefferson County, KY (USA).** The area-specific Hamiltonian Markov chain Monte Carlo  
 647 (MCMC) posterior estimates are based on seropositivity data aggregated across Jefferson County  
 648 and stratified by sewersheds. The corresponding 95% credible bounds are provided in  
 649 parenthesis. The results are based on MCMC implemented via *Rstan* library, with a 6000- and  
 650 2000-step burn-in.  
 651

|                    | <b>Jefferson<br/>County<br/>Aggregated</b>                                    | <b>MSD1</b>                                                                   | <b>MSD2</b>                                                                   | <b>MSD3-5</b>                                                                 |
|--------------------|-------------------------------------------------------------------------------|-------------------------------------------------------------------------------|-------------------------------------------------------------------------------|-------------------------------------------------------------------------------|
| $\beta$            | 0.494 (0.389, 0.572)                                                          | 0.493 (0.391, 0.575)                                                          | 0.419 (0.309, 0.503)                                                          | 0.459 (0.347, 0.542)                                                          |
| $\alpha$           | 0.009 (64%)                                                                   | 0.010 (67%)                                                                   | 0.007 (55%)                                                                   | 0.013 (76%)                                                                   |
| $\tilde{\beta}$    | 0.420 (0.321, 0.502)                                                          | 0.423 (0.3254, 0.500)                                                         | 0.412 (0.384, 0.587)                                                          | 0.445 (0.335, 0.532)                                                          |
| $\gamma$           | 0.463 (0.376, 0.532)                                                          | 0.453 (0.371, 0.520)                                                          | 0.494 (0.384, 0.587)                                                          | 0.461 (0.371, 0.533)                                                          |
| $\delta$           | 0.104 (0.067, 0.136)                                                          | 0.104 (0.066, 0.136)                                                          | 0.105 (0.069, 0.138)                                                          | 0.104 (0.066, 0.135)                                                          |
| $\rho$             | $3.750 \times 10^{-4}$<br>( $6.385 \times 10^{-5}$ , $7.426 \times 10^{-4}$ ) | $4.781 \times 10^{-4}$<br>( $9.191 \times 10^{-5}$ , $9.221 \times 10^{-4}$ ) | $4.382 \times 10^{-4}$<br>( $6.034 \times 10^{-5}$ , $9.113 \times 10^{-3}$ ) | $4.494 \times 10^{-4}$<br>( $7.366 \times 10^{-5}$ , $9.099 \times 10^{-4}$ ) |
| $\epsilon$         | $1.506 \times 10^{-3}$<br>( $1.396 \times 10^{-4}$ , $3.471 \times 10^{-3}$ ) | $1.638 \times 10^{-3}$<br>( $1.170 \times 10^{-4}$ , $3.618 \times 10^{-3}$ ) | $1.635 \times 10^{-3}$<br>( $1.802 \times 10^{-4}$ , $3.739 \times 10^{-3}$ ) | $1.649 \times 10^{-3}$<br>( $1.526 \times 10^{-4}$ , $3.619 \times 10^{-3}$ ) |
| $\psi$             | 0.0223 (0.0182, 0.0253)                                                       | 0.0222 (0.0183, 0.0253)                                                       | 0.0223 (0.0184, 0.0254)                                                       | 0.0223 (0.0184, 0.0254)                                                       |
| <b>Specificity</b> | 0.946 (0.934, 0.954)                                                          | 0.958 (0.941, 0.969)                                                          | 0.926 (0.905, 0.941)                                                          | 0.929 (0.898, 0.948)                                                          |
| <b>Sensitivity</b> | 0.637 (0.539, 0.705)                                                          | 0.638 (0.540, 0.703)                                                          | 0.648 (0.556, 0.714)                                                          | 0.643 (0.551, 0.711)                                                          |

652

653 Table S3.2. **The prior distribution specifications for the SIRT model.** Parameters were given  
 654 Gamma prior distributions, with hyper-parameters ( $a$ ,  $b$ ) listed in the table below.  
 655

| <b>Gamma<br/>(a, b)</b> | $\beta$ | $\tilde{\beta}$ | $\gamma$ | $\delta$ | $\rho$ | $\varepsilon$ | $\psi$      | <b>Specifi<br/>city</b> | <b>Sensiti<br/>vity</b> |
|-------------------------|---------|-----------------|----------|----------|--------|---------------|-------------|-------------------------|-------------------------|
| $a$                     | 40.97   | 40.97           | 41.80    | 24.29    | 2.18   | 1.74          | 112.5       | 21.7                    | 71                      |
| $b$                     | 92.32   | 92.32           | 90.32    | 232.00   | 4648   | 1039.0<br>9   | 5035.1<br>5 | 3.83                    | 38.3                    |

656  
 657 Table S3.3. **Summary of the effects of the vaccination and Delta variant mutation in**  
 658 **sewersheds of Jefferson County, KY (USA).** Percentage reduction due to vaccination effect or  
 659 excess due to Delta variant on estimates of wastewater concentration (WW) and incidence rate  
 660 (Incidence). In parenthesis, we give lower and upper bounds of 95% credible (incidence) or  
 661 confidence interval (wastewater). Some values were rounded down to 0 for simplicity.  
 662

|                                             |           | Jefferson<br>County<br>Aggregated | MSD1           | MSD2                 | MSD3–5             |
|---------------------------------------------|-----------|-----------------------------------|----------------|----------------------|--------------------|
| Vaccination effect                          | WW        | 179 (162, 200)                    | 119 (86, 157)  | 262 (238, 284)       | 135 (124, 146)     |
| with<br>Delta variant                       | Incidence | 133 (0, 147)                      | 88 (0, 94)     | 173 (27, 173)        | 80 (0, 80)         |
| Vaccination effect<br>without<br>variant    | WW        | 1370 (1272,<br>1493)              | 603 (479, 818) | 823 (801, 849)       | 928 (848,<br>1027) |
|                                             | Incidence | 564 (0, 573)                      | 323 (0, 330)   | 363 (0, 364)         | 491 (13, 491)      |
| Delta variant effect<br>without vaccination | WW        | 1157 (1049,<br>1291)              | 524 (429, 689) | 1393 (1235,<br>1590) | 741 (665, 835)     |
|                                             | Incidence | 632 (1913,<br>605)                | 340 (664, 333) | 758 (0, 760)         | 516 (18, 516)      |
| Delta variant effect<br>without vaccination | WW        | 159 (134, 185)                    | 98 (73, 126)   | 478 (389, 581)       | 101 (89, 113)      |
|                                             | Incidence | 143 (51, 144)                     | 99 (25, 99)    | 308 (8, 308)         | 101 (0, 101)       |

663

664 Table S3.4. **Summary of the Bayesian regression results in sewersheds of Jefferson County,**  
 665 **KY (USA).** Dispersion ( $\sigma$ ) is the standard deviation of the error term of the linear regression.  
 666

| Sewershed                         | Parameters              | Linear regression model<br>Posterior mean (95% credible interval)             |
|-----------------------------------|-------------------------|-------------------------------------------------------------------------------|
| Jefferson<br>County<br>Aggregated | Intercept               | $-5.563 \times 10^{-4}$ ( $-9.903 \times 10^{-4}$ , $-1.250 \times 10^{-4}$ ) |
|                                   | Slope                   | 0.453 (0.374, 0.529)                                                          |
|                                   | Dispersion ( $\sigma$ ) | $6.434 \times 10^{-4}$ ( $4.589 \times 10^{-4}$ , $9.191 \times 10^{-4}$ )    |
|                                   | Correlation             | 0.916 (0.764, 0.976)                                                          |
| MSD1                              | Intercept               | $-8.684 \times 10^{-4}$ ( $-1.757 \times 10^{-4}$ , $4.119 \times 10^{-5}$ )  |
|                                   | Slope                   | 0.357 (0.230, 0.481)                                                          |
|                                   | Dispersion ( $\sigma$ ) | $1.143 \times 10^{-4}$ ( $8.237 \times 10^{-4}$ , $1.642 \times 10^{-3}$ )    |
|                                   | Correlation             | 0.754 (0.463, 0.913)                                                          |
| MSD2                              | Intercept               | $-2.328 \times 10^{-4}$ ( $-1.001 \times 10^{-3}$ , $5.280 \times 10^{-4}$ )  |
|                                   | Slope                   | 0.932 (0.741, 1.114)                                                          |
|                                   | Dispersion ( $\sigma$ ) | $1.339 \times 10^{-3}$ ( $9.603 \times 10^{-4}$ , $1.948 \times 10^{-3}$ )    |
|                                   | Correlation             | 0.770 (0.376, 0.944)                                                          |
| MSD3–5                            | Intercept               | $-3.978 \times 10^{-4}$ ( $-7.405 \times 10^{-4}$ , $-3.951 \times 10^{-5}$ ) |
|                                   | Slope                   | 0.284 (0.236, 0.331)                                                          |
|                                   | Dispersion ( $\sigma$ ) | $5.407 \times 10^{-4}$ ( $3.843 \times 10^{-4}$ , $7.697 \times 10^{-4}$ )    |
|                                   | Correlation             | 0.896 (0.542, 0.976)                                                          |

667

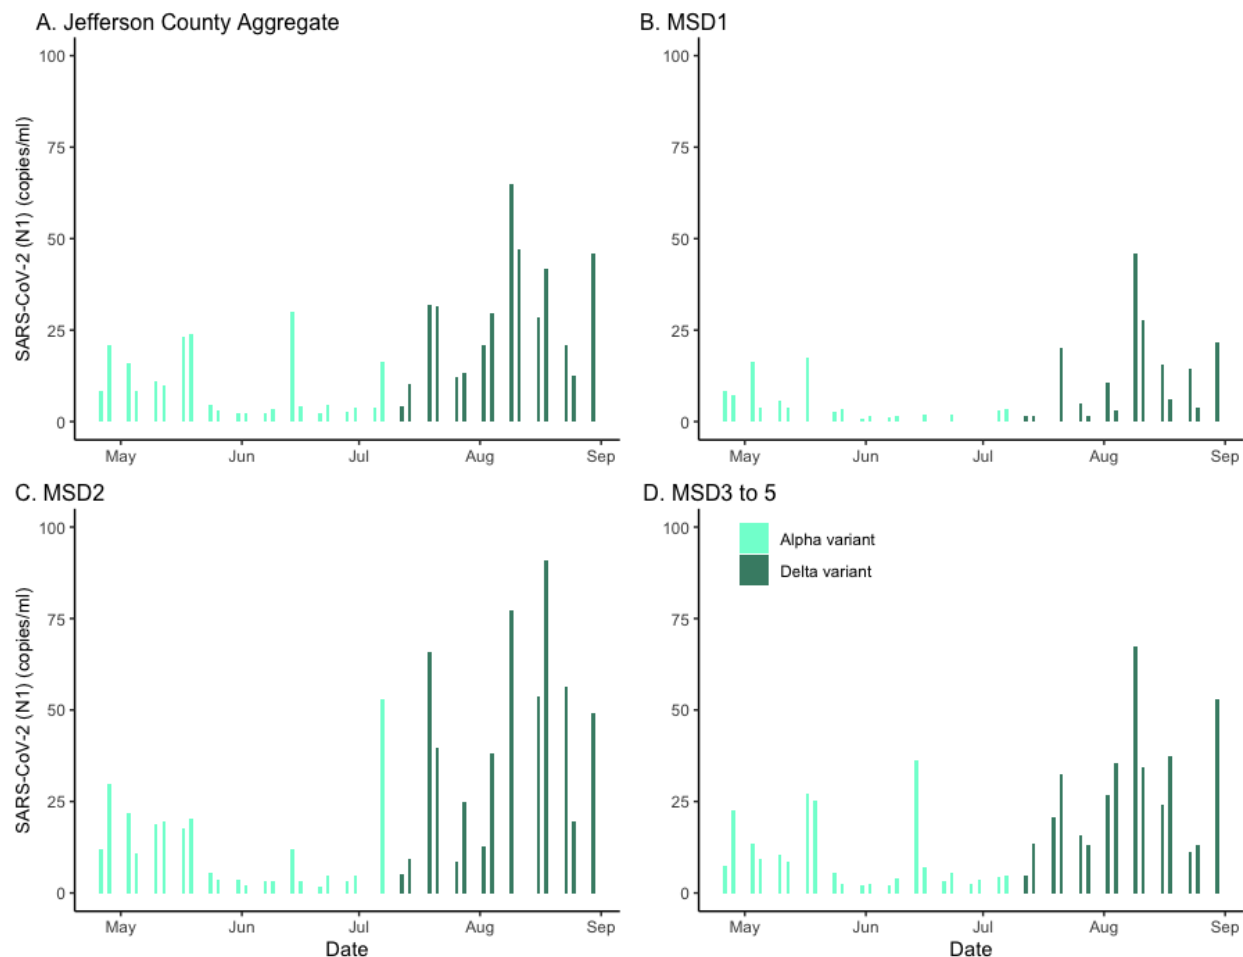

668  
669 **Figure S3.1. SARS-CoV-2 (N1) wastewater concentration in sewersheds of Jefferson**  
670 **County, KY (USA).** The wastewater concentrations during Alpha and Delta variants are  
671 represented in bars (light green for Alpha, dark green for Delta). The panels compare aggregated  
672 concentration for Jefferson County (Panel A) as well as stratified by sewershed (Panels B–D).

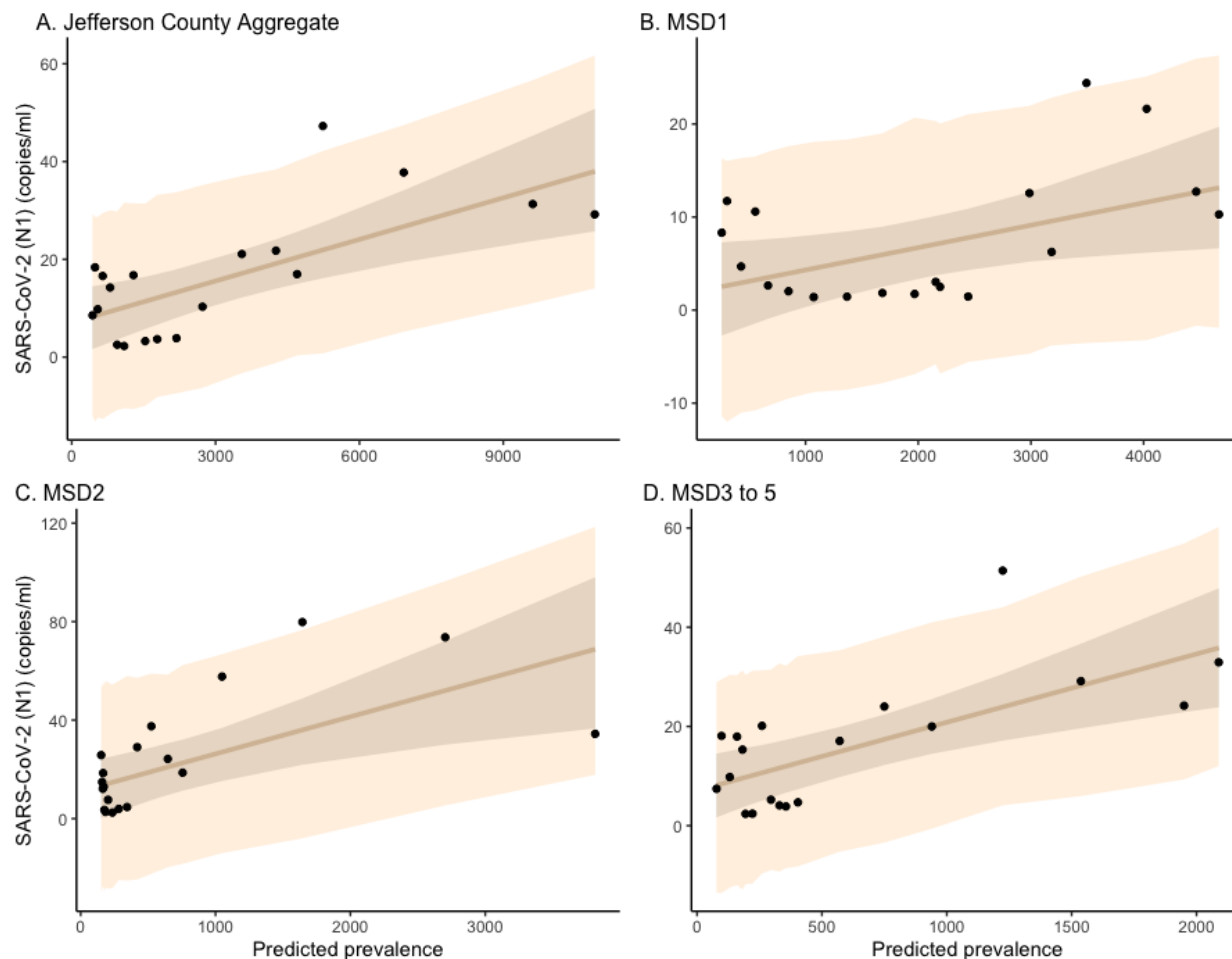

673  
674 **Figure S3.2. Prevalence versus SARS-CoV-2 (N1) wastewater concentration in sewer sheds**  
675 **of Jefferson County, KY (USA).** Bayesian regression between predicted weekly prevalence of  
676 SARS-CoV-2 infections and wastewater in the entire Jefferson County (Panel A) as well as  
677 stratified by sewer shed (Panels B–D). Straight line is the fitted Bayesian regression line. The  
678 darker shade marks the 95% credible interval and lighter shade marks the 95% prediction  
679 interval.



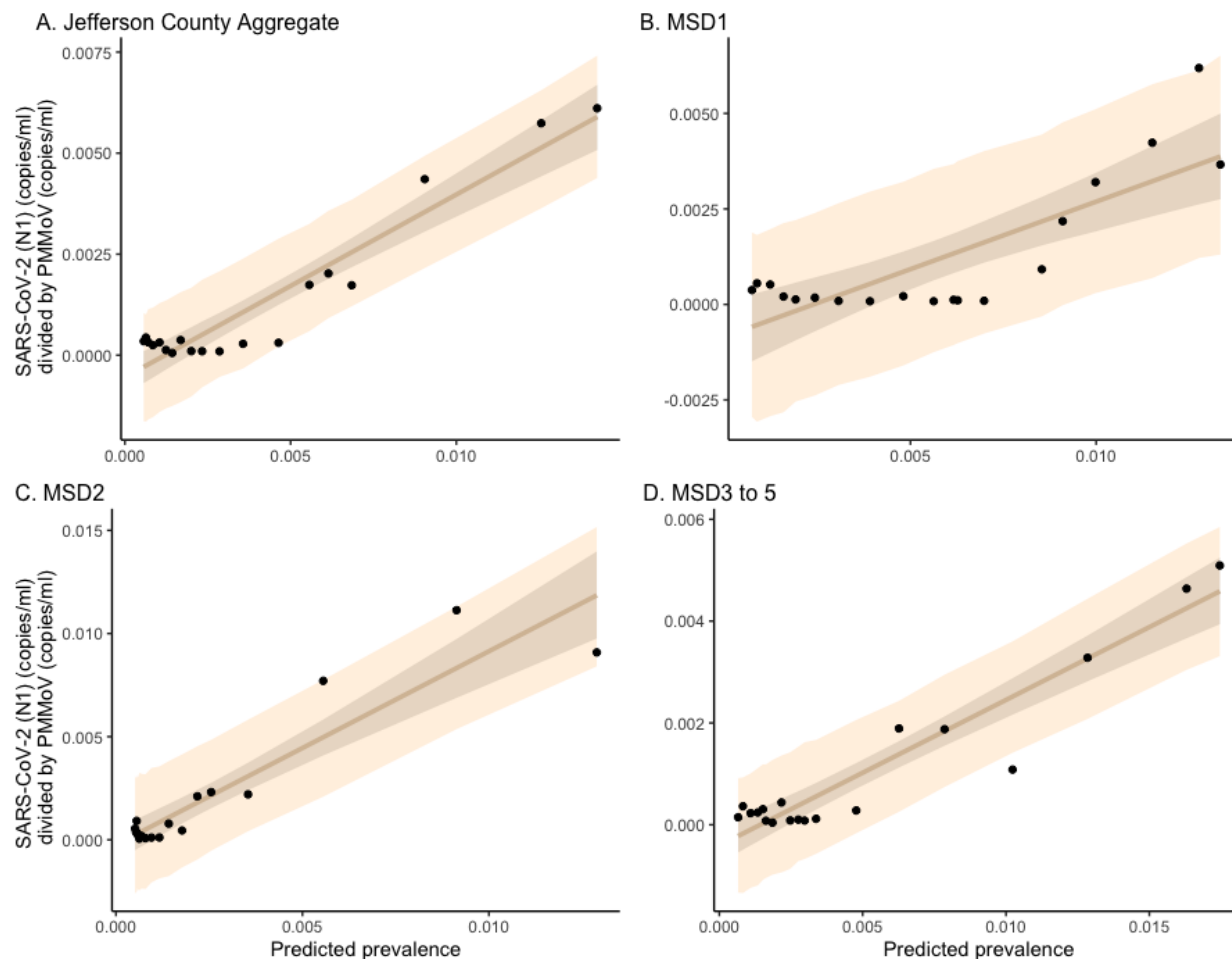

680  
681 **Figure S3.3. Prevalence versus wastewater SARS-CoV-2 (N1) normalized by pepper mild**  
682 **mottle virus concentration in sewersheds of Jefferson County, KY (USA).** Bayesian  
683 regression between predicted weekly prevalence of SARS-CoV-2 infections and wastewater in  
684 the entire Jefferson County (Panel A) as well as stratified by sewershed (Panels B–D). Straight  
685 line is the fitted Bayesian regression line. The darker shade marks the 95% credible interval and  
686 lighter shade marks the 95% prediction interval.

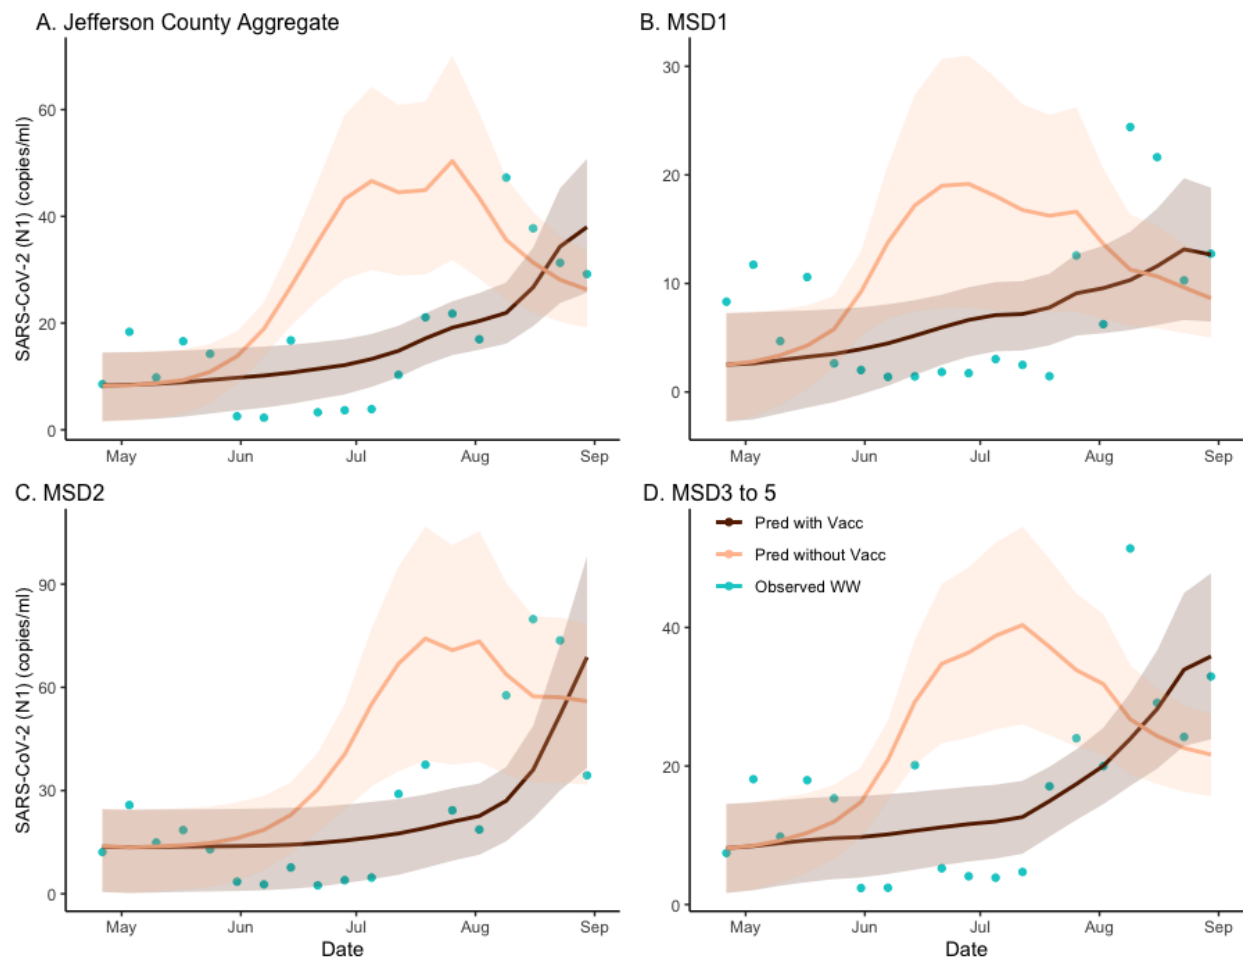

687  
688 **Figure S3.4. The estimated effect of vaccination on SARS-CoV-2 wastewater concentration**  
689 **in sewersheds of Jefferson County, KY (USA).** The deep brown line is the regression-based fit  
690 to the wastewater concentration and the light brown line is the prediction of wastewater  
691 concentration using synthetic prevalence from the model with the Delta variant effect  
692 zeroed out. The shaded areas represent 95% credible intervals. The blue dots are observed  
693 weekly average wastewater concentration. The panels compare the mutation effect on  
694 wastewater concentration for Jefferson County (Panel A) as well as stratified by sewershed  
695 (Panels B–D).

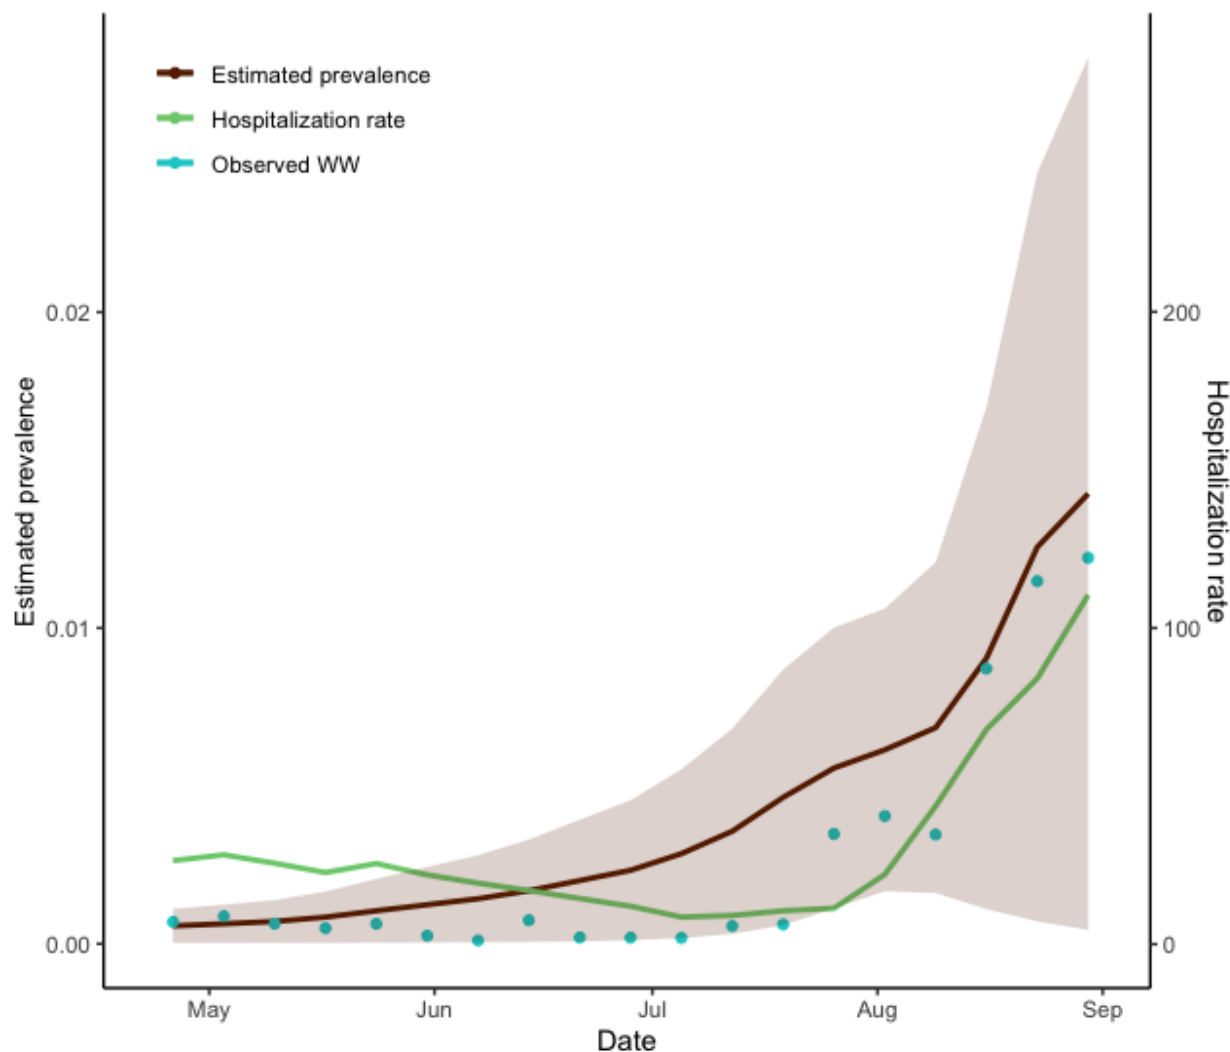

696  
697 **Figure S3.5. SARS-CoV-2 prevalence and hospitalizations versus SARS-CoV-2 wastewater**  
698 **concentration normalized by pepper mild mottle virus, Jefferson County, KY (USA).**  
699 Relationship among observed wastewater concentration, the hospitalization rate, and estimated  
700 prevalence. The dark brown line represents the estimated prevalence, and the shaded area is the  
701 95% credible interval of MCMC simulation. The green line is the weekly average of daily  
702 hospitalization rate of Jefferson County, and the blue dots represent the weekly average of  
703 wastewater concentrations. The Pearson correlation coefficient of estimated prevalence and  
704 wastewater concentration is 0.916 (95% CI=(0.764, 0.976)) and that of hospitalization rate and  
705 wastewater concentration is 0.720 (95% CI=(0.224, 0.953)).

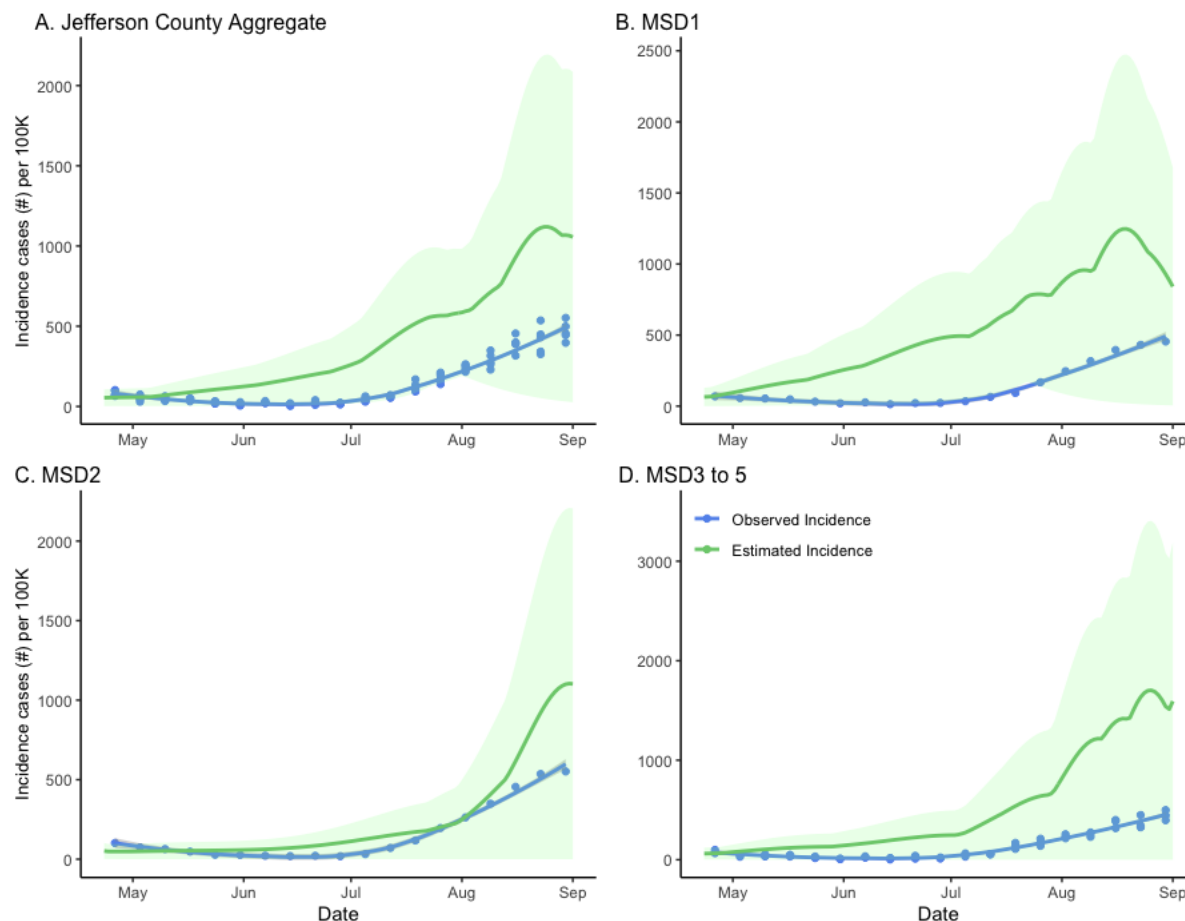

706  
707 **Figure S3.6. Clinical versus estimated incidence in sewersheds of Jefferson County, KY**  
708 **(USA).** Posterior density and credibility bounds (green curve) of the weekly aggregated  
709 incidence rate as predicted by the model compared to official weekly incidence for  
710 Jefferson County (blue dots and trend line) as reported by the Jefferson County Health  
711 Department. The panels compare aggregated incidence for Jefferson County (Panel A) as well as  
712 stratified by sewershed (Panel B–D). The model plots are based on Hamiltonian MCMC  
713 samples, with 6000 steps and 2000 steps burn-in period.

714 S3.2 Details on regression model for wastewater concentration

715 To relate the  $SVI_2RT$  model predictions to the serial wastewater measurements of SARS-CoV-2  
716 concentrations, the Bayesian linear regressions were performed based on aggregated county data  
717 and data stratified by sewershed area.

718 To obtain the linear regressions, the procedure was as follows: Let  $\tilde{I}_{tj}$  be the model estimated  
719 percentage prevalence corresponding to the same week and sewershed area.  $W_{tj}$  was defined in  
720 Eq. (5). The linear and NB regression models are given by:

721 
$$W_{tj} = \beta_0 + \beta_1 \tilde{I}_{tj} + e_{tj}, \quad (5)$$

722 In the Bayesian linear regression models, non-informative priors were assigned. Specifically, the  
723 non-informative Cauchy distribution was assigned to the regression coefficients, and the non-  
724 informative gamma prior was assigned to the dispersion parameter of the error term. The  
725 summary of the posterior estimates of all regression parameters is presented in Table S3.4, and  
726 fitting and prediction using the regression model are represented in Figure 2.

727

728 S3.3 Time lag-dependency between wastewater concentration and hospitalization rate

729 It takes a certain period for the patient to be admitted to the hospital to receive treatment. To  
730 identify the time lag-dependency between wastewater concentration and hospitalization rate, a  
731 simple linear regression analysis was performed using time-lagged variable as a predictor. Let  
732  $W_{t-d}$  be the weekly aggregated average wastewater concentration at week  $t$  the aggregated  
733 Jefferson County, and  $d$  represents a time lag.  $H_t$  represents the hospitalization rate at time  $t$ .  
734 The regression model with time lag dependent variable is given by:

735 
$$H_t = \beta_0 + \beta_1 W_{t-d} + e_t. \quad (6)$$

736

737 In this model, we changed the time lag  $d$  from 1 to 4 so that the maximum period from a shred of  
738 evidence of the community spread of COVID-19 in wastewater to reach a burden to  
739 hospitalization is about a month. Of note, hospitalizations data is available daily while  
740 wastewater is weekly

741

742 Additionally, we performed a simulation study using this regression model how to check how  
743 much the hospitalization rate changes according to the vaccination rate. We changed the  
744 vaccination rate so that the vaccination percentage of the community was 0% and predicted the  
745 serial estimates  $\text{Pred}_t$  in Eq. (4). And then, we predicted the wastewater concentration using a  
746 linear regression model and used them as the predictor in the regression model (5).

747 S3.4 Calculation of effects based on factual and counter-factual scenarios

748 All effects of the factual and counterfactual (zero vaccinated or no Delta variant). Data are

749 calculated using the area under the curve using factual (empirical) data and counterfactual

750 (synthetic) data. The equation to estimate the effect is given as:

$$\left| \frac{\text{Area under counterfactual data}}{\text{Area under factual data}} - 1 \right|$$

751

752 **References**

- 753
- 754 1 Boyle L, Hletko S, Huang J, et al. Selective sweeps in SARS-CoV-2 variant competition.  
755 *Proc Natl Acad Sci USA* 2022; **119**(47): e2213879119. doi:10.1073/pnas.2213879119
  - 756 2 Yang W, Shaman J. Development of a model-inference system for estimating  
757 epidemiological characteristics of SARS-CoV-2 variants of concern. *Nat Commun* 2021;  
758 **12.1**: 1–9. doi:10.1038/s41467-021-25913-9
  - 759 3 Smith T, Holm RH, Keith RJ, et al. Quantifying the relationship between sub-population  
760 wastewater samples and community-wide SARS-CoV-2 seroprevalence. *Sci Total*  
761 *Environ* 2022; **853**: 158567. doi:10.1016/j.scitotenv.2022.158567
  - 762 4 KhudaBukhsh WR, Choi B, Kenah E, Rempala GA. Survival dynamical systems:  
763 individual-level survival analysis from population-level epidemic models. *Interface focus*  
764 2020; **10**(1): 20190048. doi:10.1098/rsfs.2019.0048

765 **S4. Variant detection**

766

767 **Table S4.1. Periods of Alpha and Delta variant dominance in in sewersheds of Jefferson**  
768 **County, KY (USA).**

769

| Catchment site | Alpha Dominant |          | Delta Dominant |          |
|----------------|----------------|----------|----------------|----------|
|                | Begin Date     | End Date | Begin Date     | End Date |
| MSD01          | 3/30/21        | 5/17/21  | 7/12/21        | 8/30/21  |
| MSD02          | 3/30/21        | 5/24/21  | 7/12/21        | 8/30/21  |
| MSD03          | 3/30/21        | 6/21/21  | 7/19/21        | 8/30/21  |
| MSD04          | 3/30/21        | 7/5/21   | 7/19/21        | 8/30/21  |
| MSD05          | 3/30/21        | 6/28/21  | 7/26/21        | 8/30/21  |

770
